# Supplementary material for: Topology maps of bond descriptors based on the kinetic energy density and the essence of chemical bonding
Source: Royal Society of Chemistry journal article supplement (doi:10.1039/c3cp44162h), 2013-01-01
Supplement: c3cp44162h.pdf [file c3cp44162h.pdf]

# Topology Maps of a Bond Descriptor Based on the Kinetic Energy Density and the Essence of Chemical Bonding

Heiko Jacobsen

Supplementary Information

|                                      |         |
|--------------------------------------|---------|
| Energies - Geometries - Frequencies: | S1-S19  |
| LOL Topologies                       | S20-S48 |
| Kinetic Core Radii                   | S49-S51 |
| STO and GTO Basis Sets               | S52-S54 |

Energies - Geometries - Frequencies

**C2H6 1**

=====  
ADF - Version 2008.01

GEOMETRY OPTIMIZATION (Threshold met)

Density Functional: VWN PBEc PBEx

Relativistic Corrections: ---

General Accuracy: 5.00

Symmetry: C(3V)

Basis:

Carbon (TZP)

Hydrogen (TZP)

Final Geometry (x,y,z in Angstrom)

-----  
C 0.000000 0.000000 -0.764738  
C 0.000000 0.000000 0.764896  
H -0.512113 0.887006 1.166463  
H -0.512113 -0.887006 1.166463  
H 1.024226 0.000000 1.166463  
H 0.512082 -0.886952 -1.166620  
H 0.512082 0.886952 -1.166620  
H -1.024163 0.000000 -1.166620  
-----

Net Charge: 0.00

Total Bonding Energy:

-1.484798649430184 hartree

-931.73 kcal/mol

-3898.34 kJ/mol

Zero-Point Energy : 190.26 kJ/mol

Thermochemistry at 298.15 K and 1.00 atm:

Entropy : 234.02 J/mol-K

Internal Energy : 199.52 kJ/mol

Cv : 43.37 J/mol-K

Free Energy :-3766.12 kJ/mol

Frequencies (cm-1):

300.82 798.36 798.36 984.74 1176.58  
1176.58 1358.51 1371.73 1456.12 1456.12  
1456.62 1456.62 2958.58 2961.62 3012.07  
3012.07 3036.89 3036.89

Summary Geometry Optimization:

-----  
Energy Change : 0.000001

Gradient (Max): 0.000533

Gradient (RMS): 0.000135  
-----

Energies - Geometries - Frequencies

CNH5 2

=====  
ADF - Version 2008.01

GEOMETRY OPTIMIZATION (Threshold met)

Density Functional: VWN PBEc PBEx

Relativistic Corrections: ---

General Accuracy: 5.00

Symmetry: C(S)

Basis:

Carbon (TZP)

Nitrogen (TZP)

Hydrogen (TZP)

Final Geometry (x,y,z in Angstrom)

-----  
C -0.000016 -0.000016 0.000000  
N 1.469754 0.000319 0.000000  
H -0.476337 -0.998960 0.000000  
H -0.360116 0.545754 0.883301  
H -0.360116 0.545754 -0.883301  
H 1.816125 -0.510990 0.815025  
H 1.816125 -0.510990 -0.815025  
-----

Net Charge: 0.00

Total Bonding Energy:

-1.306505434557546 hartree

-819.84 kcal/mol

-3430.23 kJ/mol

Zero-Point Energy : 163.28 kJ/mol

Thermochemistry at 298.15 K and 1.00 atm:

Entropy : 241.00 J/mol-K

Internal Energy : 172.38 kJ/mol

Cv : 40.82 J/mol-K

Free Energy : -3327.23 kJ/mol

Frequencies (cm-1):

294.45 822.05 949.30 1034.29 1135.95  
1309.13 1409.14 1451.10 1472.54 1612.87  
2898.55 2995.70 3034.19 3401.12 3478.40

Summary Geometry Optimization:

-----  
Energy Change : 0.000000

Gradient (Max): 0.000389

Gradient (RMS): 0.000105  
-----

Energies - Geometries - Frequencies

COH4 3

=====  
ADF - Version 2008.01

GEOMETRY OPTIMIZATION (Threshold met)

Density Functional: VWN PBEc PBEh

Relativistic Corrections: ---

General Accuracy: 5.00

Symmetry: C(S)

Basis:

Carbon (TZP)

Oxygen (TZP)

Hydrogen (TZP)

Final Geometry (x,y,z in Angstrom)

-----  
C 0.030051 -0.009198 0.000000  
O 1.461638 0.005453 0.000000  
H -0.293470 1.038892 0.000000  
H -0.382086 -0.499390 0.898573  
H -0.382086 -0.499390 -0.898573  
H 1.766155 -0.918464 0.000000  
-----

Net Charge: 0.00

Total Bonding Energy:

-1.106421479675394 hartree

-694.29 kcal/mol

-2904.91 kJ/mol

Zero-Point Energy : 130.43 kJ/mol

Thermochemistry at 298.15 K and 1.00 atm:

Entropy : 239.04 J/mol-K

Internal Energy : 139.32 kJ/mol

Cv : 37.68 J/mol-K

Free Energy : -2834.38 kJ/mol

Frequencies (cm-1):

288.00 1009.50 1052.68 1130.92 1335.46

1428.48 1450.74 1462.41 2922.90 2973.03

3047.85 3705.24

Summary Geometry Optimization:

-----  
Energy Change : 0.000014

Gradient (Max): 0.000469

Gradient (RMS): 0.000167  
-----

Energies - Geometries - Frequencies

**CFH3 4**

=====  
ADF - Version 2008.01

GEOMETRY OPTIMIZATION (Threshold met)

Density Functional: VWN PBEc PBEh

Relativistic Corrections: ---

General Accuracy: 5.00

Symmetry: C(3V)

Basis:

Carbon (TZP)

Fluorine (TZP)

Hydrogen (TZP)

Final Geometry (x,y,z in Angstrom)

-----  
C 0.000000 0.000000 0.039818  
F 0.000000 0.000000 1.443317  
H -0.520501 0.901534 -0.311315  
H -0.520501 -0.901534 -0.311315  
H 1.041002 0.000000 -0.311315  
-----

Net Charge: 0.00

Total Bonding Energy:

-0.878109518381149 hartree

-551.02 kcal/mol

-2305.48 kJ/mol

Zero-Point Energy : 99.80 kJ/mol

Thermochemistry at 298.15 K and 1.00 atm:

Entropy : 223.02 J/mol-K

Internal Energy : 107.48 kJ/mol

Cv : 29.62 J/mol-K

Free Energy : -2262.01 kJ/mol

Frequencies (cm-1):

1019.38 1148.32 1148.32 1427.02 1444.24

1444.24 2960.35 3046.47 3046.47

Summary Geometry Optimization:

-----  
Energy Change : 0.000002

Gradient (Max): 0.000096

Gradient (RMS): 0.000048  
-----

Energies - Geometries - Frequencies

**C3H8 5**

=====  
ADF - Version 2008.01

GEOMETRY OPTIMIZATION (Threshold met)  
Density Functional: VWN PBEc PBEEx  
Relativistic Corrections: ---  
General Accuracy: 5.00  
Symmetry: C(S)

Basis:  
Carbon (TZP)  
Hydrogen (TZP)

Final Geometry (x,y,z in Angstrom)  
-----  
C -0.006474 -0.008423 0.000000  
C -1.536823 0.013241 0.000000  
C 0.571568 -1.427056 0.000000  
H 0.367930 0.539345 -0.880693  
H 0.367930 0.539345 0.880693  
H -1.940889 -0.498408 0.887707  
H -1.927382 1.041318 0.000000  
H -1.940889 -0.498408 -0.887707  
H 0.241851 -1.989148 0.887973  
H 1.671511 -1.417614 0.000000  
H 0.241851 -1.989148 -0.887973  
-----

Net Charge: 0.00

Total Bonding Energy:  
-2.090606796729378 hartree  
-1311.88 kcal/mol  
-5488.89 kJ/mol

Zero-Point Energy : 263.37 kJ/mol

Thermochemistry at 298.15 K and 1.00 atm:  
Entropy : 275.04 J/mol-K  
Internal Energy : 275.44 kJ/mol  
Cv : 63.73 J/mol-K

Free Energy :-5292.97 kJ/mol

Frequencies (cm-1):  
225.23 265.61 356.26 726.33 856.25  
880.43 900.06 1039.42 1138.45 1168.57  
1276.00 1316.70 1352.02 1369.08 1440.69  
1441.48 1448.16 1459.16 1463.31 2948.49  
2949.24 2952.37 2972.59 3011.80 3021.32  
3025.30 3028.54

Summary Geometry Optimization:

-----  
Energy Change : 0.000014  
Gradient (Max): 0.000977  
Gradient (RMS): 0.000256  
-----

Energies - Geometries - Frequencies

**C3H6 6**

=====  
ADF - Version 2008.01

GEOMETRY OPTIMIZATION (Threshold met)  
Density Functional: VWN PBEc PBEEx  
Relativistic Corrections: ---  
General Accuracy: 5.00  
Symmetry: C(S)

Basis:  
Carbon (TZP)  
Hydrogen (TZP)

Final Geometry (x,y,z in Angstrom)  
-----  
C 0.001837 0.000727 0.000000  
C 1.339503 0.004649 0.000000  
C 2.201415 1.232120 0.000000  
H -0.570489 0.932936 0.000000  
H -0.565626 -0.931713 0.000000  
H 1.868050 -0.956125 0.000000  
H 1.595322 2.148782 0.000000  
H 2.860543 1.251114 -0.882667  
H 2.860543 1.251114 0.882667  
-----

Net Charge: 0.00

Total Bonding Energy:  
-1.782806437610337 hartree  
-1118.73 kcal/mol  
-4680.76 kJ/mol

Zero-Point Energy : 202.66 kJ/mol

Thermochemistry at 298.15 K and 1.00 atm:  
Entropy : 265.49 J/mol-K  
Internal Energy : 213.56 kJ/mol  
Cv : 56.06 J/mol-K

Free Energy :-4543.87 kJ/mol

Frequencies (cm-1):  
203.86 412.91 569.78 895.85 907.64  
915.91 988.87 1027.46 1154.49 1284.90  
1354.80 1397.96 1430.46 1445.91 1656.08  
2950.16 3001.67 3033.39 3050.96 3057.06  
3141.41

Summary Geometry Optimization:

-----  
Energy Change : 0.000036  
Gradient (Max): 0.000662  
Gradient (RMS): 0.000188  
-----

Energies - Geometries - Frequencies

**C3H4 7**

=====  
ADF - Version 2008.01

GEOMETRY OPTIMIZATION (Threshold met)  
Density Functional: VWN PBEc PBEEx  
Relativistic Corrections: ---  
General Accuracy: 5.00  
Symmetry: C(3V)

Basis:  
Carbon (TZP)  
Hydrogen (TZP)

Final Geometry (x,y,z in Angstrom)  
-----  
C 0.000000 0.000000 0.048327  
C 0.000000 0.000000 1.503658  
C 0.000000 0.000000 2.715878  
H 0.000000 0.000000 3.786232  
H 0.513314 0.889086 -0.345712  
H -1.026628 0.000000 -0.345712  
H 0.513314 -0.889086 -0.345712  
-----

Net Charge: 0.00

Total Bonding Energy:  
-1.456747449905545 hartree  
-914.12 kcal/mol  
-3824.69 kJ/mol

Zero-Point Energy : 141.41 kJ/mol

Thermochemistry at 298.15 K and 1.00 atm:  
Entropy : 248.68 J/mol-K  
Internal Energy : 152.05 kJ/mol  
Cv : 53.17 J/mol-K

Free Energy : -3744.30 kJ/mol

Frequencies (cm-1):  
325.39 325.39 614.66 614.66 933.05  
1014.54 1014.54 1362.29 1432.18 1432.18  
2151.70 2964.14 3029.28 3029.28 3398.31

Summary Geometry Optimization:

-----  
Energy Change : 0.000002  
Gradient (Max): 0.000937  
Gradient (RMS): 0.000250  
-----



Energies - Geometries - Frequencies

CH4 8

=====  
ADF - Version 2008.01

GEOMETRY OPTIMIZATION (Threshold met)  
Density Functional: VWN PBEc PBEh  
Relativistic Corrections: ---  
General Accuracy: 5.00  
Symmetry: T(D)

Basis:  
Carbon (TZP)  
Hydrogen (TZP)

Final Geometry (x,y,z in Angstrom)  
-----  
C 0.000000 0.000000 0.000000  
H 0.633164 0.633164 0.633164  
H -0.633164 -0.633164 0.633164  
H 0.633164 -0.633164 -0.633164  
H -0.633164 0.633164 -0.633164  
-----

Net Charge: 0.00

Total Bonding Energy:  
-0.881456586720729 hartree  
-553.12 kcal/mol  
-2314.26 kJ/mol

Zero-Point Energy : 114.20 kJ/mol

Thermochemistry at 298.15 K and 1.00 atm:  
Entropy : 186.30 J/mol-K  
Internal Energy : 121.75 kJ/mol  
Cv : 27.48 J/mol-K

Free Energy :-2245.58 kJ/mol

Frequencies (cm-1):  
1287.94 1287.94 1287.94 1514.05 1514.05  
2964.03 3078.68 3078.68 3078.68

Summary Geometry Optimization:  
-----  
Energy Change : 0.000000  
Gradient (Max): 0.000014  
Gradient (RMS): 0.000013  
-----

Energies - Geometries - Frequencies

**SiH4 9**

=====  
ADF - Version 2008.01

GEOMETRY OPTIMIZATION (Threshold met)

Density Functional: VWN PBEc PBEh

Relativistic Corrections: ---

General Accuracy: 5.00

Symmetry: T(D)

Basis:

Silicon (TZP)

Hydrogen (TZP)

Final Geometry (x,y,z in Angstrom)

-----  
Si 0.000000 0.000000 0.000000  
H 0.862147 0.862147 0.862147  
H -0.862147 -0.862147 0.862147  
H -0.862147 0.862147 -0.862147  
H 0.862147 -0.862147 -0.862147  
-----

Net Charge: 0.00

Total Bonding Energy:

-0.693742291881820 hartree

-435.33 kcal/mol

-1821.42 kJ/mol

Zero-Point Energy : 79.30 kJ/mol

Thermochemistry at 298.15 K and 1.00 atm:

Entropy : 205.10 J/mol-K

Internal Energy : 87.45 kJ/mol

Cv : 35.46 J/mol-K

Free Energy :-1792.64 kJ/mol

Frequencies (cm-1):

873.46 873.46 873.46 946.59 946.59

2172.91 2190.29 2190.29 2190.29

Summary Geometry Optimization:

-----  
Energy Change : 0.000003

Gradient (Max): 0.000131

Gradient (RMS): 0.000117  
-----

Energies - Geometries - Frequencies

**GeH4 10**

=====  
ADF - Version 2008.01

GEOMETRY OPTIMIZATION (Threshold met)  
Density Functional: VWN PBEc PBEEx  
Relativistic Corrections: ---  
General Accuracy: 5.00  
Symmetry: T(D)

Basis:  
Germanium (TZP)  
Hydrogen (TZP)

Final Geometry (x,y,z in Angstrom)  
-----  
Ge 0.000000 0.000000 0.000000  
H 0.890133 0.890133 0.890133  
H -0.890133 -0.890133 0.890133  
H -0.890133 0.890133 -0.890133  
H 0.890133 -0.890133 -0.890133  
-----

Net Charge: 0.00

Total Bonding Energy:  
-0.648026014724808 hartree  
-406.64 kcal/mol  
-1701.39 kJ/mol

Zero-Point Energy : 75.12 kJ/mol

Thermochemistry at 298.15 K and 1.00 atm:  
Entropy : 217.97 J/mol-K  
Internal Energy : 83.48 kJ/mol  
Cv : 37.68 J/mol-K

Free Energy :-1680.42 kJ/mol

Frequencies (cm-1):  
788.18 788.18 788.18 900.06 900.06  
2087.58 2101.98 2101.98 2101.98

Summary Geometry Optimization:  
-----  
Energy Change : 0.000052  
Gradient (Max): 0.000229  
Gradient (RMS): 0.000205  
-----

Energies - Geometries - Frequencies

CF4 11

=====  
ADF - Version 2008.01

GEOMETRY OPTIMIZATION (Threshold met)  
Density Functional: VWN PBEc PBEh  
Relativistic Corrections: ---  
General Accuracy: 5.00  
Symmetry: T(D)

Basis:  
Carbon (TZP)  
Fluorine (TZP)

Final Geometry (x,y,z in Angstrom)  
-----  
C 0.000000 0.000000 0.000000  
F 0.774050 0.774050 0.774050  
F -0.774050 -0.774050 0.774050  
F 0.774050 -0.774050 -0.774050  
F -0.774050 0.774050 -0.774050  
-----

Net Charge: 0.00

Total Bonding Energy:  
-0.935628695657962 hartree  
-587.12 kcal/mol  
-2456.49 kJ/mol

Zero-Point Energy : 42.07 kJ/mol

Thermochemistry at 298.15 K and 1.00 atm:  
Entropy : 263.60 J/mol-K  
Internal Energy : 52.69 kJ/mol  
Cv : 55.22 J/mol-K

Free Energy :-2479.92 kJ/mol

Frequencies (cm-1):  
405.77 405.77 592.66 592.66 592.66  
864.97 1192.76 1192.76 1192.76

Summary Geometry Optimization:  
-----  
Energy Change : 0.000077  
Gradient (Max): 0.000131  
Gradient (RMS): 0.000117  
-----

Energies - Geometries - Frequencies

PF3 12

=====  
ADF - Version 2008.01

GEOMETRY OPTIMIZATION (Threshold met)

Density Functional: VWN PBEc PBEEx

Relativistic Corrections: ---

General Accuracy: 5.00

Symmetry: C(3V)

Basis:

Phosphorus (TZP)

Fluorine (TZP)

Final Geometry (x,y,z in Angstrom)

-----  
P 0.000000 0.000000 -0.194008  
F 1.399964 0.000000 0.605282  
F -0.699982 -1.212405 0.605282  
F -0.699982 1.212405 0.605282  
-----

Net Charge: 0.00

Total Bonding Energy:

-0.725409988075226 hartree

-455.20 kcal/mol

-1904.56 kJ/mol

Zero-Point Energy : 20.68 kJ/mol

Thermochemistry at 298.15 K and 1.00 atm:

Entropy : 276.18 J/mol-K

Internal Energy : 31.59 kJ/mol

Cv : 52.77 J/mol-K

Free Energy :-1952.84 kJ/mol

Frequencies (cm-1):

311.67 311.67 437.11 787.50 787.50  
821.90

Summary Geometry Optimization:

-----  
Energy Change : 0.000000

Gradient (Max): 0.000573

Gradient (RMS): 0.000205  
-----

Energies - Geometries - Frequencies

**SF2 13**

=====  
ADF - Version 2008.01

GEOMETRY OPTIMIZATION (Threshold met)

Density Functional: VWN PBEc PBEEx

Relativistic Corrections: ---

General Accuracy: 5.00

Symmetry: C(2V)

Basis:

Sulphur (TZP)

Fluorine (TZP)

Final Geometry (x,y,z in Angstrom)

-----  
S 0.000000 0.000000 -0.104527  
F 0.000000 -1.256057 -1.155051  
F 0.000000 1.256057 -1.155051  
-----

Net Charge: 0.00

Total Bonding Energy:

-0.382339480596118 hartree

-239.92 kcal/mol

-1003.83 kJ/mol

Zero-Point Energy : 11.06 kJ/mol

Thermochemistry at 298.15 K and 1.00 atm:

Entropy : 259.61 J/mol-K

Internal Energy : 20.02 kJ/mol

Cv : 37.75 J/mol-K

Free Energy :-1058.73 kJ/mol

Frequencies (cm-1):

309.63 758.33 780.61

Summary Geometry Optimization:

-----  
Energy Change : 0.000001

Gradient (Max): 0.000018

Gradient (RMS): 0.000009  
-----

Energies - Geometries - Frequencies

**ClF3 14**

=====  
ADF - Version 2008.01

GEOMETRY OPTIMIZATION (Threshold met)  
Density Functional: VWN PBEc PBEEx  
Relativistic Corrections: ---  
General Accuracy: 5.00  
Symmetry: C(2V)

Basis:  
Chlorine (TZP)  
Fluorine (TZP)

Final Geometry (x,y,z in Angstrom)  
-----  
Cl 0.000000 0.000000 0.098858  
F 0.000000 0.000000 -1.577642  
F 1.756627 0.000000 0.085300  
F -1.756627 0.000000 0.085300  
-----

Net Charge: 0.00

Total Bonding Energy:  
-0.338223610980255 hartree  
-212.24 kcal/mol  
-888.01 kJ/mol

Zero-Point Energy : 16.60 kJ/mol

Thermochemistry at 298.15 K and 1.00 atm:  
Entropy : 287.71 J/mol-K  
Internal Energy : 28.56 kJ/mol  
Cv : 58.29 J/mol-K

Free Energy : -942.75 kJ/mol

Frequencies (cm-1):  
248.04 310.74 347.91 498.04 673.54  
696.88

Summary Geometry Optimization:

-----  
Energy Change : 0.000008  
Gradient (Max): 0.000407  
Gradient (RMS): 0.000136  
-----

Energies - Geometries - Frequencies

PF5 15

=====  
ADF - Version 2008.01

GEOMETRY OPTIMIZATION (Threshold met)  
Density Functional: VWN PBEc PBEEx  
Relativistic Corrections: ---  
General Accuracy: 5.00  
Symmetry: C(3V)

Basis:  
Phosphorus (TZP)  
Fluorine (TZP)

Final Geometry (x,y,z in Angstrom)  
-----  
P 0.000000 0.000000 0.000570  
F 0.787878 -1.364645 0.000526  
F 0.787878 1.364645 0.000526  
F -1.575756 0.000000 0.000526  
F 0.000000 0.000000 -1.610666  
F 0.000000 0.000000 1.611770  
-----

Net Charge: 0.00

Total Bonding Energy:  
-1.071404319649902 hartree  
-672.32 kcal/mol  
-2812.97 kJ/mol

Zero-Point Energy : 41.16 kJ/mol

Thermochemistry at 298.15 K and 1.00 atm:  
Entropy : 312.88 J/mol-K  
Internal Energy : 56.07 kJ/mol  
Cv : 80.74 J/mol-K

Free Energy : -2847.70 kJ/mol

Frequencies (cm-1):  
150.84 150.84 469.11 469.11 489.90  
489.90 530.68 599.95 740.97 896.22  
946.91 946.91

Summary Geometry Optimization:  
-----  
Energy Change : 0.000010  
Gradient (Max): 0.000196  
Gradient (RMS): 0.000075  
-----



Energies - Geometries - Frequencies

**SF4 16**

=====  
ADF - Version 2008.01

GEOMETRY OPTIMIZATION (Threshold met)  
Density Functional: VWN PBEc PBEEx  
Relativistic Corrections: ---  
General Accuracy: 5.00  
Symmetry: C(2V)

Basis:  
Sulphur (TZP)  
Fluorine (TZP)

Final Geometry (x,y,z in Angstrom)  
-----  
S 0.000000 0.000000 0.378901  
F 0.000000 1.697347 0.306960  
F 1.235894 0.000000 -0.644158  
F 0.000000 -1.697347 0.306960  
F -1.235894 0.000000 -0.644158  
-----

Net Charge: 0.00

Total Bonding Energy:  
-0.692846378442915 hartree  
-434.77 kcal/mol  
-1819.07 kJ/mol

Zero-Point Energy : 27.51 kJ/mol

Thermochemistry at 298.15 K and 1.00 atm:  
Entropy : 300.96 J/mol-K  
Internal Energy : 40.98 kJ/mol  
Cv : 71.29 J/mol-K

Free Energy :-1865.34 kJ/mol

Frequencies (cm-1):  
201.55 299.77 397.20 453.54 459.87  
509.28 705.14 768.63 803.85

Summary Geometry Optimization:  
-----  
Energy Change : 0.000003  
Gradient (Max): 0.000388  
Gradient (RMS): 0.000187  
-----

Energies - Geometries - Frequencies

**NH3 18**

=====  
ADF - Version 2008.01

GEOMETRY OPTIMIZATION (Threshold met)

Density Functional: VWN PBEc PBEEx

Relativistic Corrections: ---

General Accuracy: 5.00

Symmetry: C(3V)

Basis:

Nitrogen (TZP)

Hydrogen (TZP)

Final Geometry (x,y,z in Angstrom)

-----  
N 0.000000 0.000000 0.117476  
H -0.471152 0.816060 -0.281879  
H 0.942305 0.000000 -0.281879  
H -0.471152 -0.816060 -0.281879  
-----

Net Charge: 0.00

Total Bonding Energy:

-0.715449207708494 hartree

-448.95 kcal/mol

-1878.41 kJ/mol

Zero-Point Energy : 87.65 kJ/mol

Thermochemistry at 298.15 K and 1.00 atm:

Entropy : 192.59 J/mol-K

Internal Energy : 95.18 kJ/mol

Cv : 26.77 J/mol-K

Free Energy :-1838.17 kJ/mol

Frequencies (cm-1):

1035.01 1626.01 1626.01 3374.40 3495.98  
3495.98

Summary Geometry Optimization:

-----  
Energy Change : 0.000010

Gradient (Max): 0.000205

Gradient (RMS): 0.000070  
-----

Energies - Geometries - Frequencies

**BH3 17**

=====  
ADF - Version 2008.01

GEOMETRY OPTIMIZATION (Threshold met)

Density Functional: VWN PBEc PBEEx

Relativistic Corrections: ---

General Accuracy: 5.00

Symmetry: D(3H)

Basis:

Boron (TZP)

Hydrogen (TZP)

Final Geometry (x,y,z in Angstrom)

-----  
B 0.000000 0.000000 0.000000  
H -0.599891 1.039042 0.000000  
H -0.599891 -1.039042 0.000000  
H 1.199782 0.000000 0.000000  
-----

Net Charge: 0.00

Total Bonding Energy:

-0.581902182204788 hartree

-365.15 kcal/mol

-1527.78 kJ/mol

Zero-Point Energy : 66.81 kJ/mol

Thermochemistry at 298.15 K and 1.00 atm:

Entropy : 188.55 J/mol-K

Internal Energy : 74.42 kJ/mol

Cv : 28.05 J/mol-K

Free Energy :-1507.10 kJ/mol

Frequencies (cm-1):

1117.26 1155.19 1155.19 2493.19 2624.64  
2624.64

Summary Geometry Optimization:

-----  
Energy Change : 0.000000

Gradient (Max): 0.000002

Gradient (RMS): 0.000001  
-----

Energies - Geometries - Frequencies

**H3NBH3 19**

=====  
ADF - Version 2008.01

GEOMETRY OPTIMIZATION (Threshold met)

Density Functional: VWN PBEc PBEEx

Relativistic Corrections: ---

General Accuracy: 5.00

Symmetry: C(3V)

Basis:

Boron (TZP)

Nitrogen (TZP)

Hydrogen (TZP)

Final Geometry (x,y,z in Angstrom)

-----  
B 0.000000 0.000000 -0.835476  
N 0.000000 0.000000 0.813283  
H -0.476483 0.825293 1.186179  
H -0.476483 -0.825293 1.186179  
H 0.952967 0.000000 1.186179  
H 0.587855 -1.018194 -1.152852  
H 0.587855 1.018194 -1.152852  
H -1.175709 0.000000 -1.152852  
-----

Net Charge: 0.00

Total Bonding Energy:

-1.352029545315899 hartree

-848.41 kcal/mol

-3549.75 kJ/mol

Zero-Point Energy : 178.32 kJ/mol

Thermochemistry at 298.15 K and 1.00 atm:

Entropy : 240.40 J/mol-K

Internal Energy : 188.50 kJ/mol

Cv : 51.19 J/mol-K

Free Energy :-3430.45 kJ/mol

Frequencies (cm-1):

253.16 627.23 627.23 664.49 1038.08  
1038.08 1140.61 1140.61 1144.29 1295.14  
1621.92 1621.92 2388.07 2444.73 2444.73  
3371.73 3475.32 3475.32

Summary Geometry Optimization:

-----  
Energy Change : 0.000040

Gradient (Max): 0.000745

Gradient (RMS): 0.000259  
-----

**C2H6 1**

Xyz coordinates, LOL value

(3,-3) CP: Xa

(3,-1) CP: Xb

(3,+1) CP: Xc

(3,+3) CP: Xd

|    |           |           |           |          |
|----|-----------|-----------|-----------|----------|
| Xa | -0.378760 | -0.656030 | 1.058540  | 0.912790 |
| Xa | -0.378760 | 0.656030  | 1.058540  | 0.912790 |
| Xa | 0.757520  | 0.000000  | 1.058540  | 0.912790 |
| Xa | 0.378740  | -0.656000 | -1.058590 | 0.912780 |
| Xa | 0.378740  | 0.656000  | -1.058590 | 0.912780 |
| Xa | -0.757480 | 0.000000  | -1.058590 | 0.912780 |
| Xa | 0.000000  | 0.000000  | 0.000060  | 0.819190 |
| Xa | 0.001630  | 0.000000  | -0.764180 | 0.794140 |
| Xa | 0.000820  | 0.001420  | 0.764330  | 0.794110 |
| Xb | 0.491290  | 0.000000  | -1.107530 | 0.507470 |
| Xb | -0.245650 | -0.425470 | -1.107530 | 0.507470 |
| Xb | -0.245650 | 0.425470  | -1.107530 | 0.507470 |
| Xb | 0.245660  | 0.425490  | 1.107630  | 0.507450 |
| Xb | 0.245660  | -0.425490 | 1.107630  | 0.507450 |
| Xb | -0.491310 | 0.000000  | 1.107630  | 0.507450 |
| Xb | -0.244660 | 0.423760  | 0.423460  | 0.500770 |
| Xb | -0.244660 | -0.423760 | 0.423460  | 0.500770 |
| Xb | 0.489320  | 0.000000  | 0.423460  | 0.500770 |
| Xb | -0.489350 | 0.000000  | -0.423380 | 0.500750 |
| Xb | 0.244680  | -0.423790 | -0.423380 | 0.500750 |
| Xb | 0.244680  | 0.423790  | -0.423380 | 0.500750 |
| Xb | -0.125040 | -0.216570 | 0.847660  | 0.170400 |
| Xb | -0.125040 | 0.216570  | 0.847660  | 0.170400 |
| Xb | 0.250070  | 0.000000  | 0.847660  | 0.170400 |
| Xb | 0.125030  | -0.216560 | -0.847530 | 0.170390 |
| Xb | 0.125030  | 0.216560  | -0.847530 | 0.170390 |
| Xb | -0.250060 | 0.000000  | -0.847530 | 0.170390 |
| Xb | 0.000000  | 0.000000  | -0.498390 | 0.165420 |
| Xb | 0.000000  | 0.000000  | 0.498550  | 0.165420 |
| Xc | 0.543940  | 0.000000  | -0.570430 | 0.418320 |
| Xc | -0.271970 | 0.471070  | -0.570430 | 0.418320 |
| Xc | -0.271970 | -0.471070 | -0.570430 | 0.418320 |
| Xc | 0.271960  | 0.471050  | 0.570540  | 0.418310 |
| Xc | 0.271960  | -0.471050 | 0.570540  | 0.418310 |
| Xc | -0.543920 | 0.000000  | 0.570540  | 0.418310 |
| Xc | 0.000000  | 0.000000  | 1.343380  | 0.410430 |
| Xc | 0.000000  | 0.000000  | -1.343240 | 0.410430 |
| Xc | 0.115910  | 0.200760  | 0.905550  | 0.160330 |
| Xc | 0.115910  | -0.200760 | 0.905550  | 0.160330 |
| Xc | -0.231820 | 0.000000  | 0.905550  | 0.160330 |
| Xc | 0.231810  | 0.000000  | -0.905410 | 0.160320 |
| Xc | -0.115900 | 0.200750  | -0.905410 | 0.160320 |
| Xc | -0.115900 | -0.200750 | -0.905410 | 0.160320 |
| Xc | 0.207300  | 0.000000  | 0.588350  | 0.158850 |
| Xc | -0.103650 | 0.179530  | 0.588350  | 0.158850 |
| Xc | -0.103650 | -0.179530 | 0.588350  | 0.158850 |
| Xc | 0.103670  | -0.179570 | -0.588250 | 0.158850 |
| Xc | 0.103670  | 0.179570  | -0.588250 | 0.158850 |
| Xc | -0.207350 | 0.000000  | -0.588250 | 0.158850 |
| Xd | 0.127160  | -0.220240 | 0.653440  | 0.152320 |
| Xd | 0.127160  | 0.220240  | 0.653440  | 0.152320 |
| Xd | -0.254310 | 0.000000  | 0.653440  | 0.152320 |
| Xd | 0.254330  | 0.000000  | -0.653320 | 0.152320 |
| Xd | -0.127170 | -0.220260 | -0.653320 | 0.152320 |
| Xd | -0.127170 | 0.220260  | -0.653320 | 0.152320 |
| Xd | 0.000000  | 0.000000  | 1.043240  | 0.149890 |
| Xd | 0.000000  | 0.000000  | -1.043080 | 0.149890 |

CNH5 2

XYZ coordinates, LOL value

(3,-3) CP: Xa

(3,-1) CP: Xb

(3,+1) CP: Xc

(3,+3) CP: Xd

|    |           |           |           |          |
|----|-----------|-----------|-----------|----------|
| Xa | -0.261140 | 0.400380  | 0.651440  | 0.918510 |
| Xa | -0.261140 | 0.400380  | -0.651440 | 0.918510 |
| Xa | -0.345450 | -0.735850 | 0.000000  | 0.913540 |
| Xa | 1.744980  | -0.416470 | -0.656150 | 0.900330 |
| Xa | 1.744980  | -0.416470 | 0.656150  | 0.900330 |
| Xa | 1.470150  | 0.001070  | 0.000000  | 0.797700 |
| Xa | 0.003170  | -0.000300 | 0.000000  | 0.790850 |
| Xa | 0.696190  | -0.023930 | 0.000000  | 0.768870 |
| Xa | 1.625630  | 0.450250  | 0.000000  | 0.628340 |
| Xb | 1.750120  | 0.171880  | 0.371770  | 0.564590 |
| Xb | 1.750120  | 0.171880  | -0.371770 | 0.564590 |
| Xb | 1.137670  | 0.375420  | 0.000000  | 0.560130 |
| Xb | 1.570720  | -0.494460 | 0.000000  | 0.518550 |
| Xb | -0.294620 | 0.516810  | 0.000000  | 0.515500 |
| Xb | 1.191620  | -0.362950 | -0.214360 | 0.513840 |
| Xb | 1.191620  | -0.362950 | 0.214360  | 0.513840 |
| Xb | -0.324300 | -0.233270 | -0.439130 | 0.511080 |
| Xb | -0.324300 | -0.233270 | 0.439130  | 0.511080 |
| Xb | 0.328770  | -0.492030 | 0.000000  | 0.480100 |
| Xb | 0.368920  | 0.203480  | 0.411960  | 0.478570 |
| Xb | 0.368920  | 0.203480  | -0.411960 | 0.478570 |
| Xb | 1.534520  | 0.198160  | 0.000000  | 0.204660 |
| Xb | 1.407400  | -0.212350 | 0.000000  | 0.189870 |
| Xb | -0.063070 | 0.128030  | 0.219400  | 0.173390 |
| Xb | -0.063070 | 0.128030  | -0.219400 | 0.173390 |
| Xb | -0.083210 | -0.249050 | 0.000000  | 0.171870 |
| Xb | 0.270070  | -0.024130 | 0.000000  | 0.156970 |
| Xc | 1.276960  | -0.452890 | 0.000000  | 0.508010 |
| Xc | 1.226040  | 0.074920  | 0.425900  | 0.470070 |
| Xc | 1.226040  | 0.074920  | -0.425900 | 0.470070 |
| Xc | 1.938350  | -0.160520 | 0.000000  | 0.466070 |
| Xc | 0.223610  | -0.277930 | -0.450280 | 0.413880 |
| Xc | 0.223610  | -0.277930 | 0.450280  | 0.413880 |
| Xc | 0.260420  | 0.509640  | 0.000000  | 0.400590 |
| Xc | -0.576190 | 0.031360  | 0.000000  | 0.391860 |
| Xc | 1.554760  | -0.038640 | 0.201570  | 0.172010 |
| Xc | 1.554760  | -0.038640 | -0.201570 | 0.172010 |
| Xc | 1.250690  | 0.051260  | 0.000000  | 0.166870 |
| Xc | -0.101680 | 0.249920  | 0.000000  | 0.162200 |
| Xc | -0.110640 | -0.124390 | -0.212850 | 0.161870 |
| Xc | -0.110640 | -0.124390 | 0.212850  | 0.161870 |
| Xc | 0.208920  | -0.178610 | 0.000000  | 0.154570 |
| Xc | 0.224360  | 0.052340  | -0.149840 | 0.154280 |
| Xc | 0.224360  | 0.052340  | 0.149840  | 0.154280 |
| Xd | 1.324870  | 0.027690  | -0.173800 | 0.163340 |
| Xd | 1.324870  | 0.027690  | 0.173800  | 0.163340 |
| Xd | 1.681120  | -0.085270 | 0.000000  | 0.161320 |
| Xd | 0.163980  | -0.123620 | -0.187930 | 0.151380 |
| Xd | 0.163980  | -0.123620 | 0.187930  | 0.151380 |
| Xd | 0.178410  | 0.215270  | 0.000000  | 0.149360 |
| Xd | -0.280460 | 0.010820  | 0.000000  | 0.143720 |

**COH4 3**

XYZ coordinates, LOL value

(3,-3) CP: Xa

(3,-1) CP: Xb

(3,+1) CP: Xc

(3,+3) CP: Xd

|    |           |           |           |          |
|----|-----------|-----------|-----------|----------|
| Xa | -0.203300 | 0.759160  | 0.000000  | 0.924680 |
| Xa | -0.267290 | -0.370350 | -0.658490 | 0.919390 |
| Xa | -0.267290 | -0.370350 | 0.658490  | 0.919390 |
| Xa | 1.713440  | -0.778230 | 0.000000  | 0.880220 |
| Xa | 1.460830  | 0.004340  | 0.000000  | 0.798400 |
| Xa | 0.034900  | -0.009890 | 0.000000  | 0.786940 |
| Xa | 0.688040  | -0.028490 | 0.000000  | 0.708000 |
| Xa | 1.553950  | 0.154060  | 0.368710  | 0.601730 |
| Xa | 1.553950  | 0.154060  | -0.368710 | 0.601730 |
| Xb | 1.689300  | 0.348190  | 0.000000  | 0.580220 |
| Xb | 1.584790  | -0.277860 | 0.307670  | 0.555680 |
| Xb | 1.584790  | -0.277860 | -0.307670 | 0.555680 |
| Xb | 1.115120  | 0.038830  | 0.281340  | 0.548500 |
| Xb | 1.115120  | 0.038830  | -0.281340 | 0.548500 |
| Xb | -0.252210 | 0.258620  | -0.442260 | 0.517310 |
| Xb | -0.252210 | 0.258620  | 0.442260  | 0.517310 |
| Xb | -0.271950 | -0.514570 | 0.000000  | 0.515010 |
| Xb | 0.398030  | -0.262550 | 0.383090  | 0.461170 |
| Xb | 0.398030  | -0.262550 | -0.383090 | 0.461170 |
| Xb | 0.426510  | 0.418390  | 0.000000  | 0.455450 |
| Xb | 1.473890  | 0.025950  | -0.176730 | 0.217510 |
| Xb | 1.473890  | 0.025950  | 0.176730  | 0.217510 |
| Xb | -0.019600 | 0.246130  | 0.000000  | 0.176340 |
| Xb | -0.034320 | -0.136900 | 0.218390  | 0.174670 |
| Xb | -0.034320 | -0.136900 | -0.218390 | 0.174670 |
| Xb | 0.304100  | -0.048350 | 0.000000  | 0.147720 |
| Xc | 1.191230  | 0.339100  | 0.000000  | 0.505910 |
| Xc | 1.872800  | -0.110810 | 0.000000  | 0.502900 |
| Xc | 1.184860  | -0.347290 | 0.000000  | 0.498480 |
| Xc | 0.290660  | -0.519310 | 0.000000  | 0.408230 |
| Xc | 0.314250  | 0.227610  | 0.434770  | 0.395110 |
| Xc | 0.314250  | 0.227610  | -0.434770 | 0.395110 |
| Xc | -0.546330 | 0.013710  | 0.000000  | 0.374950 |
| Xc | 1.555170  | 0.160160  | 0.000000  | 0.199140 |
| Xc | 1.392840  | -0.174530 | 0.000000  | 0.183570 |
| Xc | -0.058870 | -0.263330 | 0.000000  | 0.163870 |
| Xc | -0.054890 | 0.114750  | 0.223140  | 0.163750 |
| Xc | -0.054890 | 0.114750  | -0.223140 | 0.163750 |
| Xc | 0.287460  | -0.092910 | 0.063130  | 0.147520 |
| Xc | 0.287460  | -0.092910 | -0.063130 | 0.147520 |
| Xc | 0.292970  | 0.081790  | 0.000000  | 0.146990 |
| Xd | 1.620260  | -0.102960 | 0.000000  | 0.172150 |
| Xd | 1.282850  | 0.079340  | 0.000000  | 0.170840 |
| Xd | 0.264030  | -0.161910 | 0.000000  | 0.147190 |
| Xd | 0.257850  | 0.064220  | -0.147120 | 0.145670 |
| Xd | 0.257850  | 0.064220  | 0.147120  | 0.145670 |
| Xd | -0.252980 | -0.001510 | 0.000000  | 0.137640 |

**CFH3 4**

XYZ coordinates, LOL value

(3,-3) CP: Xa

(3,-1) CP: Xb

(3,+1) CP: Xc

(3,+3) CP: Xd

|    |           |           |           |          |
|----|-----------|-----------|-----------|----------|
| Xa | -0.380420 | -0.658910 | -0.212980 | 0.926880 |
| Xa | -0.380420 | 0.658910  | -0.212980 | 0.926880 |
| Xa | 0.760850  | 0.000000  | -0.212980 | 0.926880 |
| Xa | -0.000040 | -0.000070 | 0.039150  | 0.796260 |
| Xa | -0.008860 | 0.000000  | 1.443510  | 0.771190 |
| Xa | 0.000000  | 0.000000  | 0.677280  | 0.642470 |
| Xa | 0.176660  | -0.305980 | 1.512440  | 0.578950 |
| Xa | -0.353320 | 0.000000  | 1.512440  | 0.578950 |
| Xa | 0.176660  | 0.305980  | 1.512440  | 0.578950 |
| Xb | 0.352740  | 0.000000  | 1.514120  | 0.578210 |
| Xb | -0.176370 | 0.305480  | 1.514120  | 0.578210 |
| Xb | -0.176370 | -0.305480 | 1.514120  | 0.578210 |
| Xb | -0.207780 | 0.000000  | 1.092880  | 0.524800 |
| Xb | 0.103890  | -0.179940 | 1.092880  | 0.524800 |
| Xb | 0.103890  | 0.179940  | 1.092880  | 0.524800 |
| Xb | -0.522030 | 0.000000  | -0.220350 | 0.520440 |
| Xb | 0.261010  | 0.452090  | -0.220350 | 0.520440 |
| Xb | 0.261010  | -0.452090 | -0.220350 | 0.520440 |
| Xb | -0.211110 | -0.365650 | 0.446520  | 0.438280 |
| Xb | 0.422210  | 0.000000  | 0.446520  | 0.438280 |
| Xb | -0.211110 | 0.365650  | 0.446520  | 0.438280 |
| Xb | 0.077640  | 0.134480  | 1.452250  | 0.222730 |
| Xb | 0.077640  | -0.134480 | 1.452250  | 0.222730 |
| Xb | -0.155280 | 0.000000  | 1.452250  | 0.222730 |
| Xb | 0.254510  | 0.000000  | -0.009360 | 0.178080 |
| Xb | -0.127250 | 0.220410  | -0.009360 | 0.178080 |
| Xb | -0.127250 | -0.220410 | -0.009360 | 0.178080 |
| Xc | 0.208870  | 0.000000  | 1.094700  | 0.524480 |
| Xc | -0.104440 | 0.180890  | 1.094700  | 0.524480 |
| Xc | -0.104440 | -0.180890 | 1.094700  | 0.524480 |
| Xc | 0.000000  | 0.000000  | 1.810660  | 0.520170 |
| Xc | -0.472400 | 0.000000  | 0.361090  | 0.387320 |
| Xc | 0.236200  | -0.409110 | 0.361090  | 0.387320 |
| Xc | 0.236200  | 0.409110  | 0.361090  | 0.387320 |
| Xc | 0.000000  | 0.000000  | -0.537220 | 0.357400 |
| Xc | -0.077650 | -0.134490 | 1.452280  | 0.222680 |
| Xc | -0.077650 | 0.134500  | 1.452280  | 0.222680 |
| Xc | 0.155300  | 0.000000  | 1.452280  | 0.222680 |
| Xc | 0.129520  | -0.224330 | -0.028620 | 0.166060 |
| Xc | 0.129520  | 0.224330  | -0.028620 | 0.166060 |
| Xc | -0.259030 | 0.000000  | -0.028620 | 0.166060 |
| Xd | 0.000000  | 0.000000  | 1.605150  | 0.190530 |
| Xd | 0.000000  | 0.000000  | 1.274560  | 0.180920 |
| Xd | 0.000000  | 0.000000  | 0.323660  | 0.136110 |
| Xd | 0.000000  | 0.000000  | -0.246180 | 0.130810 |



**C3H8 5**

Xyz coordinates, LOL value

(3,-3) CP: Xa

(3,-1) CP: Xb

(3,+1) CP: Xc

(3,+3) CP: Xd

|    |           |           |           |          |
|----|-----------|-----------|-----------|----------|
| Xa | 0.268450  | 0.393830  | -0.651600 | 0.912890 |
| Xa | 0.268450  | 0.393830  | 0.651600  | 0.912890 |
| Xa | -1.822950 | 0.773980  | 0.000000  | 0.912790 |
| Xa | 1.384380  | -1.417310 | 0.000000  | 0.912780 |
| Xa | 0.326820  | -1.840070 | -0.656990 | 0.911980 |
| Xa | 0.326820  | -1.840070 | 0.656990  | 0.911980 |
| Xa | -1.832800 | -0.365000 | -0.656840 | 0.911970 |
| Xa | -1.832800 | -0.365000 | 0.656840  | 0.911970 |
| Xa | -0.771610 | -0.002990 | 0.000000  | 0.819430 |
| Xa | 0.277680  | -0.719640 | 0.000000  | 0.819340 |
| Xa | -0.006720 | -0.008790 | -0.000440 | 0.796750 |
| Xa | 0.572250  | -1.428670 | 0.000000  | 0.794040 |
| Xa | -1.538830 | 0.013290  | 0.000000  | 0.793440 |
| Xb | 0.331640  | 0.486460  | 0.000000  | 0.508030 |
| Xb | 0.926270  | -1.655020 | -0.425440 | 0.506650 |
| Xb | 0.926270  | -1.655020 | 0.425440  | 0.506650 |
| Xb | -1.878250 | 0.260760  | 0.425370  | 0.506630 |
| Xb | -1.878250 | 0.260760  | -0.425370 | 0.506630 |
| Xb | -1.883880 | -0.475800 | 0.000000  | 0.506350 |
| Xb | 0.242040  | -1.928050 | 0.000000  | 0.506310 |
| Xb | 0.217420  | -1.204170 | 0.423720  | 0.503610 |
| Xb | 0.217420  | -1.204170 | -0.423720 | 0.503610 |
| Xb | -1.200660 | -0.235650 | -0.423810 | 0.503590 |
| Xb | -1.200660 | -0.235650 | 0.423810  | 0.503590 |
| Xb | -0.352570 | 0.228250  | -0.425280 | 0.503190 |
| Xb | -0.352570 | 0.228250  | 0.425280  | 0.503190 |
| Xb | 0.340210  | -0.244870 | 0.425080  | 0.503180 |
| Xb | 0.340210  | -0.244870 | -0.425080 | 0.503180 |
| Xb | -1.190630 | 0.497480  | 0.000000  | 0.500330 |
| Xb | 0.896610  | -0.928360 | 0.000000  | 0.500270 |
| Xb | -0.342120 | -0.500640 | 0.000000  | 0.496620 |
| Xb | 0.076110  | 0.112330  | 0.218660  | 0.170860 |
| Xb | 0.076110  | 0.112330  | -0.218660 | 0.170860 |
| Xb | -1.619130 | 0.263610  | 0.000000  | 0.170060 |
| Xb | 0.834730  | -1.412590 | 0.000000  | 0.170040 |
| Xb | -1.620470 | -0.111010 | 0.216970  | 0.169900 |
| Xb | -1.620470 | -0.111010 | -0.216970 | 0.169900 |
| Xb | 0.486210  | -1.550050 | 0.217020  | 0.169900 |
| Xb | 0.486210  | -1.550050 | -0.217020 | 0.169900 |
| Xb | -1.271320 | 0.006290  | 0.000000  | 0.166400 |
| Xb | 0.468570  | -1.182180 | 0.000000  | 0.166310 |
| Xb | -0.272220 | -0.017980 | 0.000000  | 0.166110 |
| Xb | 0.081540  | -0.259440 | 0.000000  | 0.166010 |
| Xc | -0.003980 | -1.454240 | 0.000000  | 0.420330 |
| Xc | -1.352990 | -0.532800 | 0.000000  | 0.420260 |
| Xc | 0.754130  | -1.147520 | 0.471150  | 0.419380 |
| Xc | 0.754130  | -1.147520 | -0.471150 | 0.419380 |
| Xc | -1.343020 | 0.284910  | 0.471240  | 0.419320 |
| Xc | -1.343020 | 0.284910  | -0.471240 | 0.419320 |
| Xc | -0.195590 | -0.285860 | -0.469530 | 0.417650 |
| Xc | -0.195590 | -0.285860 | 0.469530  | 0.417650 |
| Xc | 0.571540  | 0.001010  | 0.000000  | 0.411840 |
| Xc | -0.207890 | 0.533420  | 0.000000  | 0.411760 |
| Xc | -2.115320 | 0.017130  | 0.000000  | 0.410920 |
| Xc | 0.785440  | -1.964600 | 0.000000  | 0.410890 |
| Xc | -1.679360 | 0.128810  | 0.199860  | 0.160050 |
| Xc | -1.679360 | 0.128810  | -0.199860 | 0.160050 |
| Xc | 0.731100  | -1.517560 | 0.199940  | 0.160040 |
| Xc | 0.731100  | -1.517560 | -0.199940 | 0.160040 |
| Xc | 0.146590  | 0.215290  | 0.000000  | 0.159850 |
| Xc | -1.680920 | -0.216780 | 0.000000  | 0.159840 |
| Xc | 0.409520  | -1.644800 | 0.000000  | 0.159830 |
| Xc | -1.367660 | -0.096910 | 0.181920  | 0.159430 |

LOL Topologies

|    |           |           |           |          |
|----|-----------|-----------|-----------|----------|
| Xc | -1.367660 | -0.096910 | -0.181920 | 0.159430 |
| Xc | 0.407490  | -1.309050 | -0.181680 | 0.159400 |
| Xc | 0.407490  | -1.309050 | 0.181680  | 0.159400 |
| Xc | -0.182550 | 0.076240  | 0.189240  | 0.159010 |
| Xc | -0.182550 | 0.076240  | -0.189240 | 0.159010 |
| Xc | 0.136710  | -0.142040 | 0.188790  | 0.158970 |
| Xc | 0.136710  | -0.142040 | -0.188790 | 0.158970 |
| Xc | -1.363070 | 0.222640  | 0.000000  | 0.158900 |
| Xc | 0.703100  | -1.188830 | 0.000000  | 0.158870 |
| Xc | -0.160000 | -0.234380 | 0.000000  | 0.157680 |
| Xd | -1.437120 | -0.245410 | 0.000000  | 0.152720 |
| Xd | 0.294360  | -1.427830 | 0.000000  | 0.152700 |
| Xd | -1.429590 | 0.141650  | -0.221400 | 0.152310 |
| Xd | -1.429590 | 0.141650  | 0.221400  | 0.152310 |
| Xd | 0.652040  | -1.280170 | -0.221260 | 0.152300 |
| Xd | 0.652040  | -1.280170 | 0.221260  | 0.152300 |
| Xd | -0.105840 | -0.154710 | -0.214460 | 0.152090 |
| Xd | -0.105840 | -0.154710 | 0.214460  | 0.152090 |
| Xd | -1.815220 | 0.014040  | 0.000000  | 0.150090 |
| Xd | 0.673570  | -1.686110 | 0.000000  | 0.150060 |
| Xd | 0.271780  | -0.018930 | 0.000000  | 0.149870 |
| Xd | -0.117180 | 0.247080  | 0.000000  | 0.149840 |

**C3H6 6**

XYZ coordinates, LOL value

(3,-3) CP: Xa

(3,-1) CP: Xb

(3,+1) CP: Xc

(3,+3) CP: Xd

|    |           |           |           |          |
|----|-----------|-----------|-----------|----------|
| Xa | 1.730310  | -0.699380 | 0.000000  | 0.920820 |
| Xa | -0.416420 | -0.685330 | 0.000000  | 0.920020 |
| Xa | -0.419860 | 0.686050  | 0.000000  | 0.919180 |
| Xa | 1.752420  | 1.907790  | 0.000000  | 0.915440 |
| Xa | 2.688420  | 1.243830  | 0.653230  | 0.911780 |
| Xa | 2.688420  | 1.243830  | -0.653230 | 0.911780 |
| Xa | 1.761200  | 0.613920  | 0.000000  | 0.822340 |
| Xa | 2.201310  | 1.231830  | 0.000000  | 0.797470 |
| Xa | 0.002610  | 0.000730  | 0.000000  | 0.796450 |
| Xa | 1.340450  | 0.004700  | 0.000000  | 0.796310 |
| Xa | 0.673120  | 0.010350  | 0.000000  | 0.775970 |
| Xb | 2.801220  | 1.225250  | 0.000000  | 0.513420 |
| Xb | 2.206480  | 1.651280  | -0.426490 | 0.504930 |
| Xb | 2.206480  | 1.651280  | 0.426490  | 0.504930 |
| Xb | 2.199540  | 0.819970  | 0.434760  | 0.503680 |
| Xb | 2.199540  | 0.819970  | -0.434760 | 0.503680 |
| Xb | 1.609240  | 1.238330  | 0.000000  | 0.500570 |
| Xb | 1.920740  | -0.021000 | 0.000000  | 0.488270 |
| Xb | -0.581550 | 0.000440  | 0.000000  | 0.483700 |
| Xb | 0.149410  | 0.403140  | -0.408720 | 0.468670 |
| Xb | 0.149410  | 0.403140  | 0.408720  | 0.468670 |
| Xb | 0.144730  | -0.390710 | -0.422630 | 0.468440 |
| Xb | 0.144730  | -0.390710 | 0.422630  | 0.468440 |
| Xb | 1.157640  | -0.416090 | -0.372810 | 0.466100 |
| Xb | 1.157640  | -0.416090 | 0.372810  | 0.466100 |
| Xb | 1.193500  | 0.415310  | 0.399660  | 0.463650 |
| Xb | 1.193500  | 0.415310  | -0.399660 | 0.463650 |
| Xb | 1.083520  | 0.014070  | 0.000000  | 0.181490 |
| Xb | 0.258830  | 0.004590  | 0.000000  | 0.180000 |
| Xb | 1.490730  | -0.209290 | 0.000000  | 0.173380 |
| Xb | -0.149660 | -0.213550 | 0.000000  | 0.172440 |
| Xb | -0.150090 | 0.215010  | 0.000000  | 0.171940 |
| Xb | 2.044740  | 1.443340  | 0.000000  | 0.171010 |
| Xb | 1.506800  | 0.208460  | 0.000000  | 0.170700 |
| Xb | 2.358620  | 1.225380  | 0.211560  | 0.170030 |
| Xb | 2.358620  | 1.225380  | -0.211560 | 0.170030 |
| Xb | 2.043200  | 1.019240  | 0.000000  | 0.167060 |
| Xc | 1.057890  | -0.498660 | 0.000000  | 0.455340 |
| Xc | 0.269340  | 0.511900  | 0.000000  | 0.454300 |
| Xc | 0.276500  | -0.506790 | 0.000000  | 0.450610 |
| Xc | 1.085550  | 0.520780  | 0.000000  | 0.449780 |
| Xc | -0.218310 | 0.002610  | -0.550100 | 0.426340 |
| Xc | -0.218310 | 0.002610  | 0.550100  | 0.426340 |
| Xc | 1.872610  | 1.239360  | 0.475400  | 0.420480 |
| Xc | 1.872610  | 1.239360  | -0.475400 | 0.420480 |
| Xc | 2.524430  | 0.754530  | 0.000000  | 0.416260 |
| Xc | 1.533310  | -0.009920 | -0.560550 | 0.415930 |
| Xc | 1.533310  | -0.009920 | 0.560550  | 0.415930 |
| Xc | 2.535560  | 1.703740  | 0.000000  | 0.412780 |
| Xc | 1.610720  | 0.006510  | 0.000000  | 0.163140 |
| Xc | -0.269940 | 0.002360  | 0.000000  | 0.161930 |
| Xc | 2.471470  | 1.214710  | 0.000000  | 0.161430 |
| Xc | 1.930570  | 1.214660  | 0.000000  | 0.160240 |
| Xc | 2.196700  | 1.413170  | 0.202050  | 0.159940 |
| Xc | 2.196700  | 1.413170  | -0.202050 | 0.159940 |
| Xc | 2.189970  | 1.033840  | -0.185830 | 0.159200 |
| Xc | 2.189970  | 1.033840  | 0.185830  | 0.159200 |
| Xc | 0.106450  | 0.252080  | 0.000000  | 0.158690 |
| Xc | 1.226020  | -0.242640 | 0.000000  | 0.158080 |
| Xc | 0.112400  | -0.248530 | 0.000000  | 0.158060 |
| Xc | 1.249880  | 0.262490  | 0.000000  | 0.157840 |
| Xd | 2.042890  | 1.221600  | -0.227270 | 0.152670 |
| Xd | 2.042890  | 1.221600  | 0.227270  | 0.152670 |

## LOL Topologies

|    |           |          |           |          |
|----|-----------|----------|-----------|----------|
| Xd | 2.342780  | 0.993260 | 0.000000  | 0.152580 |
| Xd | 2.360590  | 1.460070 | 0.000000  | 0.150600 |
| Xd | -0.054250 | 0.002010 | -0.275600 | 0.144240 |
| Xd | -0.054250 | 0.002010 | 0.275600  | 0.144240 |
| Xd | 1.390650  | 0.005670 | -0.278340 | 0.141160 |
| Xd | 1.390650  | 0.005670 | 0.278340  | 0.141160 |

**C3H4 7**

XYZ coordinates, LOL value

(3,-3) CP: Xa

(3,-1) CP: Xb

(3,+1) CP: Xc

(3,+3) CP: Xd

|    |           |           |           |          |
|----|-----------|-----------|-----------|----------|
| Xa | 0.000000  | 0.000000  | 3.509100  | 0.926930 |
| Xa | 0.379930  | -0.658060 | -0.241450 | 0.915420 |
| Xa | 0.379930  | 0.658060  | -0.241450 | 0.915420 |
| Xa | -0.759870 | 0.000000  | -0.241450 | 0.915420 |
| Xa | 0.000000  | 0.000000  | 0.793850  | 0.815660 |
| Xa | 0.000000  | 0.000000  | 2.716690  | 0.796720 |
| Xa | -0.000040 | 0.000000  | 0.049730  | 0.794980 |
| Xa | 0.000000  | 0.000000  | 1.507220  | 0.789900 |
| Xa | -0.085790 | 0.148600  | 2.106970  | 0.694200 |
| Xa | 0.171580  | 0.000000  | 2.106970  | 0.694200 |
| Xa | -0.085790 | -0.148600 | 2.106970  | 0.694200 |
| Xb | -0.245440 | -0.425110 | -0.289250 | 0.511610 |
| Xb | 0.490880  | 0.000000  | -0.289250 | 0.511610 |
| Xb | -0.245440 | 0.425110  | -0.289250 | 0.511610 |
| Xb | 0.247240  | 0.428240  | 0.390320  | 0.498430 |
| Xb | -0.494490 | 0.000000  | 0.390320  | 0.498430 |
| Xb | 0.247240  | -0.428240 | 0.390320  | 0.498430 |
| Xb | 0.576790  | 0.000000  | 2.849000  | 0.450530 |
| Xb | -0.288390 | 0.499510  | 2.849000  | 0.450530 |
| Xb | -0.288390 | -0.499510 | 2.849000  | 0.450530 |
| Xb | -0.288660 | -0.499970 | 1.379640  | 0.445310 |
| Xb | -0.288660 | 0.499970  | 1.379640  | 0.445310 |
| Xb | 0.577320  | 0.000000  | 1.379640  | 0.445310 |
| Xb | 0.000000  | 0.000000  | 1.757050  | 0.184340 |
| Xb | 0.000000  | 0.000000  | 2.461690  | 0.183630 |
| Xb | 0.000000  | 0.000000  | 2.976990  | 0.176800 |
| Xb | 0.000000  | 0.000000  | 1.242330  | 0.176750 |
| Xb | -0.250340 | 0.000000  | -0.030870 | 0.172010 |
| Xb | 0.125170  | 0.216800  | -0.030870 | 0.172010 |
| Xb | 0.125170  | -0.216800 | -0.030870 | 0.172010 |
| Xb | 0.000000  | 0.000000  | 0.315740  | 0.163690 |
| Xc | 0.000000  | 0.000000  | 2.107430  | 0.691470 |
| Xc | -0.576870 | 0.000000  | 2.848390  | 0.450210 |
| Xc | 0.288440  | 0.499590  | 2.848390  | 0.450210 |
| Xc | 0.288440  | -0.499590 | 2.848390  | 0.450210 |
| Xc | 0.288690  | -0.500020 | 1.382470  | 0.443580 |
| Xc | 0.288690  | 0.500020  | 1.382470  | 0.443580 |
| Xc | -0.577380 | 0.000000  | 1.382470  | 0.443580 |
| Xc | -0.270740 | 0.468940  | 0.250950  | 0.416440 |
| Xc | -0.270740 | -0.468940 | 0.250950  | 0.416440 |
| Xc | 0.541480  | 0.000000  | 0.250950  | 0.416440 |
| Xc | 0.000000  | 0.000000  | -0.527610 | 0.411530 |
| Xc | 0.236620  | 0.000000  | -0.082090 | 0.161800 |
| Xc | -0.118310 | 0.204920  | -0.082090 | 0.161800 |
| Xc | -0.118310 | -0.204920 | -0.082090 | 0.161800 |
| Xc | -0.195810 | 0.000000  | 0.238320  | 0.158380 |
| Xc | 0.097900  | -0.169570 | 0.238320  | 0.158380 |
| Xc | 0.097900  | 0.169570  | 0.238320  | 0.158380 |
| Xc | -0.136530 | -0.236490 | 2.768820  | 0.149770 |
| Xc | 0.273070  | 0.000000  | 2.768820  | 0.149770 |
| Xc | 0.273850  | 0.000000  | 1.451250  | 0.148430 |
| Xd | -0.122870 | -0.212820 | 0.177820  | 0.152730 |
| Xd | -0.122870 | 0.212820  | 0.177820  | 0.152730 |
| Xd | 0.245750  | 0.000000  | 0.177820  | 0.152730 |
| Xd | 0.136560  | 0.236520  | 2.768720  | 0.149740 |
| Xd | 0.136550  | -0.236520 | 2.768720  | 0.149740 |
| Xd | -0.273110 | 0.000000  | 2.768720  | 0.149740 |
| Xd | 0.000000  | 0.000000  | -0.229480 | 0.149430 |
| Xd | 0.137030  | -0.237340 | 1.451720  | 0.148270 |
| Xd | -0.274050 | 0.000000  | 1.451720  | 0.148270 |
| Xd | 0.137030  | 0.237340  | 1.451720  | 0.148270 |

**CH4 8**

XYZ coordinates, LOL value

(3,-3) CP: Xa

(3,-1) CP: Xb

(3,+1) CP: Xc

(3,+3) CP: Xd

|    |           |           |           |          |
|----|-----------|-----------|-----------|----------|
| Xa | -0.468170 | -0.468170 | 0.468170  | 0.913070 |
| Xa | 0.468170  | 0.468170  | 0.468170  | 0.913070 |
| Xa | -0.468170 | 0.468170  | -0.468170 | 0.913070 |
| Xa | 0.468170  | -0.468170 | -0.468170 | 0.913070 |
| Xa | 0.000540  | 0.000540  | -0.000540 | 0.795930 |
| Xb | -0.598580 | 0.000000  | 0.000000  | 0.505590 |
| Xb | 0.000000  | -0.598580 | 0.000000  | 0.505590 |
| Xb | 0.000000  | 0.000000  | -0.598580 | 0.505590 |
| Xb | 0.598580  | 0.000000  | 0.000000  | 0.505590 |
| Xb | 0.000000  | 0.000000  | 0.598580  | 0.505590 |
| Xb | 0.000000  | 0.598580  | 0.000000  | 0.505590 |
| Xb | -0.152250 | 0.152250  | -0.152250 | 0.169970 |
| Xb | 0.152250  | -0.152250 | -0.152250 | 0.169970 |
| Xb | -0.152250 | -0.152250 | 0.152250  | 0.169970 |
| Xb | 0.152250  | 0.152250  | 0.152250  | 0.169970 |
| Xc | -0.333810 | 0.333810  | 0.333810  | 0.418150 |
| Xc | 0.333810  | 0.333810  | -0.333810 | 0.418150 |
| Xc | -0.333810 | -0.333810 | -0.333810 | 0.418150 |
| Xc | 0.333810  | -0.333810 | 0.333810  | 0.418150 |
| Xc | 0.000000  | 0.000000  | -0.271330 | 0.160400 |
| Xc | 0.000000  | -0.271330 | 0.000000  | 0.160400 |
| Xc | 0.271330  | 0.000000  | 0.000000  | 0.160400 |
| Xc | 0.000000  | 0.271330  | 0.000000  | 0.160400 |
| Xc | 0.000000  | 0.000000  | 0.271330  | 0.160400 |
| Xc | -0.271330 | 0.000000  | 0.000000  | 0.160400 |
| Xd | -0.160160 | 0.160160  | 0.160160  | 0.152630 |
| Xd | 0.160160  | 0.160160  | -0.160160 | 0.152630 |
| Xd | 0.160160  | -0.160160 | 0.160160  | 0.152630 |
| Xd | -0.160160 | -0.160160 | -0.160160 | 0.152630 |

SiH4 9

|    |           |           |           |          |
|----|-----------|-----------|-----------|----------|
| Xa | -0.611410 | -0.611410 | 0.611410  | 0.870550 |
| Xa | 0.611410  | 0.611410  | 0.611410  | 0.870550 |
| Xa | -0.611410 | 0.611410  | -0.611410 | 0.870550 |
| Xa | 0.611410  | -0.611410 | -0.611410 | 0.870550 |
| Xa | -0.856810 | 0.856810  | -0.856970 | 0.822820 |
| Xa | -0.856980 | -0.856980 | 0.856620  | 0.822780 |
| Xa | 0.856510  | -0.856070 | -0.856070 | 0.822720 |
| Xa | 0.856560  | 0.856560  | 0.858430  | 0.821480 |
| Xa | -0.008420 | -0.008420 | -0.008420 | 0.712530 |
| Xa | -0.118140 | 0.118140  | 0.118140  | 0.571320 |
| Xa | 0.118140  | 0.118140  | -0.118140 | 0.571320 |
| Xa | -0.118140 | -0.118140 | -0.118140 | 0.571320 |
| Xa | 0.118140  | -0.118140 | 0.118140  | 0.571320 |
| Xb | -0.831200 | -0.831200 | 0.831200  | 0.821810 |
| Xb | -0.831200 | 0.831200  | -0.831200 | 0.821810 |
| Xb | 0.831200  | -0.831200 | -0.831200 | 0.821810 |
| Xb | 0.831200  | 0.831200  | 0.831200  | 0.821810 |
| Xb | 0.000000  | -0.204360 | 0.000000  | 0.570010 |
| Xb | 0.204360  | 0.000000  | 0.000000  | 0.570010 |
| Xb | 0.000000  | 0.204360  | 0.000000  | 0.570010 |
| Xb | 0.000000  | 0.000000  | 0.204360  | 0.570010 |
| Xb | 0.000000  | 0.000000  | -0.204360 | 0.570010 |
| Xb | -0.204360 | 0.000000  | 0.000000  | 0.570010 |
| Xb | -0.990820 | 0.000000  | 0.000000  | 0.409720 |
| Xb | 0.000000  | 0.000000  | -0.990820 | 0.409720 |
| Xb | 0.000000  | -0.990820 | 0.000000  | 0.409720 |
| Xb | 0.000000  | 0.000000  | 0.990820  | 0.409720 |
| Xb | 0.990820  | 0.000000  | 0.000000  | 0.409720 |
| Xb | 0.000000  | 0.990820  | 0.000000  | 0.409720 |
| Xb | -0.052080 | -0.052080 | -0.052080 | 0.265990 |
| Xb | 0.052080  | -0.052080 | 0.052080  | 0.265990 |
| Xb | 0.052080  | 0.052080  | -0.052080 | 0.265990 |
| Xb | -0.052080 | 0.052080  | 0.052080  | 0.265990 |
| Xb | -0.315100 | -0.315100 | 0.315100  | 0.178270 |
| Xb | 0.315100  | -0.315100 | -0.315100 | 0.178270 |
| Xb | -0.315100 | 0.315100  | -0.315100 | 0.178270 |
| Xb | 0.315100  | 0.315100  | 0.315100  | 0.178270 |
| Xc | 0.117830  | 0.117830  | 0.117830  | 0.568660 |
| Xc | 0.117830  | -0.117830 | -0.117830 | 0.568660 |
| Xc | -0.117830 | -0.117830 | 0.117830  | 0.568660 |
| Xc | -0.117830 | 0.117830  | -0.117830 | 0.568660 |
| Xc | -0.570870 | -0.570870 | -0.570870 | 0.269830 |
| Xc | 0.570870  | 0.570870  | -0.570870 | 0.269830 |
| Xc | 0.570870  | -0.570870 | 0.570870  | 0.269830 |
| Xc | -0.570870 | 0.570870  | 0.570870  | 0.269830 |
| Xc | 0.090230  | 0.000000  | 0.000000  | 0.265910 |
| Xc | 0.000000  | 0.000000  | 0.090230  | 0.265910 |
| Xc | -0.090230 | 0.000000  | 0.000000  | 0.265910 |
| Xc | 0.000000  | 0.090230  | 0.000000  | 0.265910 |
| Xc | 0.000000  | 0.000000  | -0.090230 | 0.265910 |
| Xc | 0.000000  | -0.090230 | 0.000000  | 0.265910 |
| Xc | 0.588100  | 0.000000  | 0.000000  | 0.147460 |
| Xc | 0.000000  | 0.588100  | 0.000000  | 0.147460 |
| Xc | 0.000000  | -0.588100 | 0.000000  | 0.147460 |
| Xc | 0.000000  | 0.000000  | -0.588100 | 0.147460 |
| Xc | -0.588100 | 0.000000  | 0.000000  | 0.147460 |
| Xc | 0.000000  | 0.000000  | 0.588100  | 0.147460 |
| Xd | 0.052110  | 0.052110  | 0.052110  | 0.265820 |
| Xd | 0.052110  | -0.052110 | -0.052110 | 0.265820 |
| Xd | -0.052110 | 0.052110  | -0.052110 | 0.265820 |
| Xd | -0.052110 | -0.052110 | 0.052110  | 0.265820 |
| Xd | -0.358990 | -0.358990 | -0.358990 | 0.125930 |
| Xd | -0.358990 | 0.358990  | 0.358990  | 0.125930 |
| Xd | 0.358990  | -0.358990 | 0.358990  | 0.125930 |
| Xd | 0.358990  | 0.358990  | -0.358990 | 0.125930 |

**GeH4 10**

Xyz coordinates, LOL value

(3,-3) CP: Xa

(3,-1) CP: Xb

(3,+1) CP: Xc

(3,+3) CP: Xd

|    |           |           |           |          |
|----|-----------|-----------|-----------|----------|
| Xa | -0.885560 | -0.885560 | 0.885670  | 0.821370 |
| Xa | 0.884430  | 0.884430  | 0.884590  | 0.821190 |
| Xa | 0.884370  | -0.884370 | -0.884710 | 0.821170 |
| Xa | -0.884590 | 0.884600  | -0.884260 | 0.821170 |
| Xa | -0.722640 | -0.722640 | 0.722640  | 0.820440 |
| Xa | -0.722640 | 0.722640  | -0.722640 | 0.820440 |
| Xa | 0.722640  | -0.722640 | -0.722640 | 0.820440 |
| Xa | 0.722640  | 0.722640  | 0.722640  | 0.820440 |
| Xa | 0.162310  | 0.162310  | 0.162310  | 0.571270 |
| Xa | -0.162310 | -0.162310 | 0.162310  | 0.571270 |
| Xa | -0.162310 | 0.162310  | -0.162310 | 0.571270 |
| Xa | 0.162310  | -0.162310 | -0.162310 | 0.571270 |
| Xa | 0.043380  | -0.043380 | 0.043380  | 0.562590 |
| Xa | -0.043380 | -0.043380 | -0.043380 | 0.562590 |
| Xa | 0.043380  | 0.043380  | -0.043380 | 0.562590 |
| Xa | -0.043380 | 0.043380  | 0.043380  | 0.562590 |
| Xa | 0.017500  | 0.017500  | 0.017500  | 0.332260 |
| Xb | -0.817090 | -0.817090 | 0.817090  | 0.815870 |
| Xb | -0.817090 | 0.817090  | -0.817090 | 0.815870 |
| Xb | 0.817090  | -0.817090 | -0.817090 | 0.815870 |
| Xb | 0.817090  | 0.817090  | 0.817090  | 0.815870 |
| Xb | 0.282220  | 0.000000  | 0.000000  | 0.568090 |
| Xb | 0.000000  | -0.282220 | 0.000000  | 0.568090 |
| Xb | -0.282220 | 0.000000  | 0.000000  | 0.568090 |
| Xb | 0.000000  | 0.282220  | 0.000000  | 0.568090 |
| Xb | 0.000000  | 0.000000  | -0.282220 | 0.568090 |
| Xb | 0.000000  | 0.000000  | 0.282220  | 0.568090 |
| Xb | 0.000000  | -0.075110 | 0.000000  | 0.561920 |
| Xb | 0.075110  | 0.000000  | 0.000000  | 0.561920 |
| Xb | 0.000000  | 0.075110  | 0.000000  | 0.561920 |
| Xb | 0.000000  | 0.000000  | 0.075110  | 0.561920 |
| Xb | 0.000000  | 0.000000  | -0.075110 | 0.561920 |
| Xb | -0.075110 | 0.000000  | 0.000000  | 0.561920 |
| Xb | -1.107750 | 0.000000  | 0.000000  | 0.328980 |
| Xb | 0.000000  | 0.000000  | -1.107750 | 0.328980 |
| Xb | 0.000000  | 0.000000  | 1.107750  | 0.328980 |
| Xb | 0.000000  | 1.107750  | 0.000000  | 0.328980 |
| Xb | 1.107750  | 0.000000  | 0.000000  | 0.328980 |
| Xb | 0.000000  | -1.107750 | 0.000000  | 0.328980 |
| Xb | -0.020140 | -0.020140 | -0.020140 | 0.319750 |
| Xb | -0.020140 | 0.020140  | 0.020140  | 0.319750 |
| Xb | 0.020140  | -0.020140 | 0.020140  | 0.319750 |
| Xb | 0.020140  | 0.020140  | -0.020140 | 0.319750 |
| Xb | 0.089500  | -0.089500 | -0.089500 | 0.312500 |
| Xb | -0.089500 | -0.089500 | 0.089500  | 0.312500 |
| Xb | -0.089500 | 0.089500  | -0.089500 | 0.312500 |
| Xb | 0.089500  | 0.089500  | 0.089500  | 0.312500 |
| Xb | -0.377730 | -0.377730 | 0.377730  | 0.226980 |
| Xb | 0.377730  | -0.377730 | -0.377730 | 0.226980 |
| Xb | -0.377730 | 0.377730  | -0.377730 | 0.226980 |
| Xb | 0.377730  | 0.377730  | 0.377730  | 0.226980 |
| Xc | -0.163450 | -0.163450 | -0.163450 | 0.565380 |
| Xc | 0.163450  | 0.163450  | -0.163450 | 0.565380 |
| Xc | 0.163450  | -0.163450 | 0.163450  | 0.565380 |
| Xc | -0.163450 | 0.163450  | 0.163450  | 0.565380 |
| Xc | -0.043360 | -0.043360 | 0.043360  | 0.561330 |
| Xc | -0.043360 | 0.043360  | -0.043360 | 0.561330 |
| Xc | 0.043360  | 0.043360  | 0.043360  | 0.561330 |
| Xc | 0.043360  | -0.043360 | -0.043360 | 0.561330 |
| Xc | -0.034900 | 0.000000  | 0.000000  | 0.319660 |
| Xc | 0.000000  | -0.034900 | 0.000000  | 0.319660 |
| Xc | 0.000000  | 0.000000  | -0.034900 | 0.319660 |
| Xc | 0.034900  | 0.000000  | 0.000000  | 0.319660 |



LOL Topologies

|    |           |           |           |          |
|----|-----------|-----------|-----------|----------|
| Xc | 0.000000  | 0.000000  | 0.034900  | 0.319660 |
| Xc | 0.000000  | 0.034900  | 0.000000  | 0.319660 |
| Xc | 0.000000  | 0.155520  | 0.000000  | 0.310570 |
| Xc | 0.155520  | 0.000000  | 0.000000  | 0.310570 |
| Xc | 0.000000  | -0.155520 | 0.000000  | 0.310570 |
| Xc | -0.155520 | 0.000000  | 0.000000  | 0.310570 |
| Xc | 0.000000  | 0.000000  | 0.155520  | 0.310570 |
| Xc | 0.000000  | 0.000000  | -0.155520 | 0.310570 |
| Xc | -0.608140 | -0.608140 | -0.608140 | 0.253140 |
| Xc | -0.608140 | 0.608140  | 0.608140  | 0.253140 |
| Xc | 0.608140  | 0.608140  | -0.608140 | 0.253140 |
| Xc | 0.608140  | -0.608140 | 0.608140  | 0.253140 |
| Xc | -0.707200 | 0.000000  | 0.000000  | 0.209550 |
| Xc | 0.000000  | 0.000000  | 0.707200  | 0.209550 |
| Xc | 0.000000  | 0.707200  | 0.000000  | 0.209550 |
| Xc | 0.707200  | 0.000000  | 0.000000  | 0.209550 |
| Xc | 0.000000  | 0.000000  | -0.707200 | 0.209550 |
| Xc | 0.000000  | -0.707200 | 0.000000  | 0.209550 |
| Xd | -0.020150 | 0.020150  | -0.020150 | 0.319570 |
| Xd | 0.020150  | 0.020150  | 0.020150  | 0.319570 |
| Xd | 0.020150  | -0.020150 | -0.020150 | 0.319570 |
| Xd | -0.020150 | -0.020150 | 0.020150  | 0.319570 |
| Xd | 0.090040  | -0.090040 | 0.090040  | 0.309250 |
| Xd | -0.090040 | -0.090040 | -0.090040 | 0.309250 |
| Xd | -0.090040 | 0.090040  | 0.090040  | 0.309250 |
| Xd | 0.090040  | 0.090040  | -0.090040 | 0.309250 |
| Xd | -0.426560 | -0.426560 | -0.426560 | 0.203790 |
| Xd | -0.426560 | 0.426560  | 0.426560  | 0.203790 |
| Xd | 0.426560  | -0.426560 | 0.426560  | 0.203790 |
| Xd | 0.426560  | 0.426560  | -0.426560 | 0.203790 |

**CF4 11**

Xyz coordinates, LOL value

(3,-3) CP: Xa

(3,-1) CP: Xb

(3,+1) CP: Xc

(3,+3) CP: Xd

|    |           |           |           |          |
|----|-----------|-----------|-----------|----------|
| Xa | 0.000510  | 0.000510  | -0.000510 | 0.796170 |
| Xa | -0.766250 | 0.783550  | -0.766250 | 0.748520 |
| Xa | 0.783550  | 0.766250  | 0.766250  | 0.748520 |
| Xa | -0.766250 | -0.783550 | 0.766250  | 0.748520 |
| Xa | 0.766250  | -0.766250 | -0.783550 | 0.748520 |
| Xa | -0.341660 | -0.341660 | 0.341660  | 0.664480 |
| Xa | -0.341660 | 0.341660  | -0.341660 | 0.664480 |
| Xa | 0.341660  | -0.341660 | -0.341660 | 0.664480 |
| Xa | 0.341660  | 0.341660  | 0.341660  | 0.664480 |
| Xa | -0.957380 | -0.525790 | 0.957380  | 0.577770 |
| Xa | 0.957380  | 0.525790  | 0.957380  | 0.577770 |
| Xa | 0.525790  | 0.957380  | 0.957380  | 0.577770 |
| Xa | 0.957380  | 0.957380  | 0.525790  | 0.577770 |
| Xa | -0.525790 | 0.957380  | -0.957380 | 0.577770 |
| Xa | -0.957380 | -0.957380 | 0.525790  | 0.577770 |
| Xa | -0.957380 | 0.525790  | -0.957380 | 0.577770 |
| Xa | -0.525790 | -0.957380 | 0.957380  | 0.577770 |
| Xa | 0.525790  | -0.957380 | -0.957380 | 0.577770 |
| Xa | -0.957380 | 0.957380  | -0.525790 | 0.577770 |
| Xa | 0.957380  | -0.525790 | -0.957380 | 0.577770 |
| Xa | 0.957380  | -0.957380 | -0.525790 | 0.577770 |
| Xb | 0.672080  | 0.672080  | 1.102340  | 0.576380 |
| Xb | -0.672080 | -1.102340 | 0.672080  | 0.576380 |
| Xb | -0.672080 | -0.672080 | 1.102340  | 0.576380 |
| Xb | -1.102340 | -0.672080 | 0.672080  | 0.576380 |
| Xb | 1.102340  | 0.672080  | 0.672080  | 0.576380 |
| Xb | 0.672080  | 1.102340  | 0.672080  | 0.576380 |
| Xb | 0.672080  | -1.102340 | -0.672080 | 0.576380 |
| Xb | 1.102340  | -0.672080 | -0.672080 | 0.576380 |
| Xb | 0.672080  | -0.672080 | -1.102340 | 0.576380 |
| Xb | -0.672080 | 1.102340  | -0.672080 | 0.576380 |
| Xb | -1.102340 | 0.672080  | -0.672080 | 0.576380 |
| Xb | -0.672080 | 0.672080  | -1.102340 | 0.576380 |
| Xb | -0.395280 | -0.674830 | 0.674830  | 0.531770 |
| Xb | 0.674830  | 0.395280  | 0.674830  | 0.531770 |
| Xb | 0.674830  | -0.674830 | -0.395280 | 0.531770 |
| Xb | -0.395280 | 0.674830  | -0.674830 | 0.531770 |
| Xb | 0.395280  | -0.674830 | -0.674830 | 0.531770 |
| Xb | 0.674830  | -0.395280 | -0.674830 | 0.531770 |
| Xb | -0.674830 | -0.674830 | 0.395280  | 0.531770 |
| Xb | -0.674830 | 0.674830  | -0.395280 | 0.531770 |
| Xb | -0.674830 | 0.395280  | -0.674830 | 0.531770 |
| Xb | 0.674830  | 0.674830  | 0.395280  | 0.531770 |
| Xb | 0.395280  | 0.674830  | 0.674830  | 0.531770 |
| Xb | -0.674830 | -0.395280 | 0.674830  | 0.531770 |
| Xb | -0.558730 | 0.000000  | 0.000000  | 0.425830 |
| Xb | 0.000000  | -0.558730 | 0.000000  | 0.425830 |
| Xb | 0.558730  | 0.000000  | 0.000000  | 0.425830 |
| Xb | 0.000000  | 0.000000  | 0.558730  | 0.425830 |
| Xb | 0.000000  | 0.558730  | 0.000000  | 0.425830 |
| Xb | 0.000000  | 0.000000  | -0.558730 | 0.425830 |
| Xb | -0.842870 | 0.842870  | -0.652610 | 0.221870 |
| Xb | 0.842870  | -0.842870 | -0.652610 | 0.221870 |
| Xb | -0.842870 | -0.842870 | 0.652610  | 0.221870 |
| Xb | 0.842870  | 0.842870  | 0.652610  | 0.221870 |
| Xb | -0.652610 | 0.842870  | -0.842870 | 0.221870 |
| Xb | 0.842870  | -0.652610 | -0.842870 | 0.221870 |
| Xb | -0.842870 | -0.652610 | 0.842870  | 0.221870 |
| Xb | -0.652610 | -0.842870 | 0.842870  | 0.221870 |
| Xb | -0.842870 | 0.652610  | -0.842870 | 0.221870 |
| Xb | 0.652610  | -0.842870 | -0.842870 | 0.221870 |
| Xb | 0.842870  | 0.652610  | 0.842870  | 0.221870 |
| Xb | 0.652610  | 0.842870  | 0.842870  | 0.221870 |

LOL Topologies

|    |           |           |           |          |
|----|-----------|-----------|-----------|----------|
| Xb | 0.154770  | 0.154770  | 0.154770  | 0.161420 |
| Xb | -0.154770 | 0.154770  | -0.154770 | 0.161420 |
| Xb | 0.154770  | -0.154770 | -0.154770 | 0.161420 |
| Xb | -0.154770 | -0.154770 | 0.154770  | 0.161420 |
| Xc | 0.489960  | -0.771450 | -0.489960 | 0.530900 |
| Xc | 0.489960  | 0.489960  | 0.771450  | 0.530900 |
| Xc | -0.771450 | -0.489960 | 0.489960  | 0.530900 |
| Xc | 0.489960  | -0.489960 | -0.771450 | 0.530900 |
| Xc | 0.489960  | 0.771450  | 0.489960  | 0.530900 |
| Xc | 0.771450  | -0.489960 | -0.489960 | 0.530900 |
| Xc | 0.771450  | 0.489960  | 0.489960  | 0.530900 |
| Xc | -0.771450 | 0.489960  | -0.489960 | 0.530900 |
| Xc | -0.489960 | 0.489960  | -0.771450 | 0.530900 |
| Xc | -0.489960 | 0.771450  | -0.489970 | 0.530900 |
| Xc | -0.489960 | -0.489970 | 0.771450  | 0.530900 |
| Xc | -0.489960 | -0.771450 | 0.489960  | 0.530900 |
| Xc | -0.984770 | -0.984770 | 0.984770  | 0.525870 |
| Xc | 0.984770  | -0.984770 | -0.984770 | 0.525870 |
| Xc | -0.984770 | 0.984770  | -0.984770 | 0.525870 |
| Xc | 0.984770  | 0.984770  | 0.984770  | 0.525870 |
| Xc | -0.321720 | -0.321720 | -0.321720 | 0.357140 |
| Xc | -0.321720 | 0.321720  | 0.321720  | 0.357140 |
| Xc | 0.321720  | -0.321720 | 0.321720  | 0.357140 |
| Xc | 0.321720  | 0.321720  | -0.321720 | 0.357140 |
| Xc | -0.906370 | -0.716070 | 0.716060  | 0.221760 |
| Xc | -0.906370 | 0.716060  | -0.716060 | 0.221760 |
| Xc | 0.716060  | -0.716060 | -0.906370 | 0.221760 |
| Xc | -0.716060 | 0.906370  | -0.716060 | 0.221760 |
| Xc | 0.906370  | -0.716060 | -0.716060 | 0.221760 |
| Xc | -0.716070 | 0.716060  | -0.906370 | 0.221760 |
| Xc | 0.716060  | -0.906370 | -0.716060 | 0.221760 |
| Xc | 0.906370  | 0.716060  | 0.716060  | 0.221760 |
| Xc | 0.716060  | 0.716060  | 0.906370  | 0.221760 |
| Xc | 0.716060  | 0.906370  | 0.716060  | 0.221760 |
| Xc | -0.716060 | -0.716060 | 0.906370  | 0.221760 |
| Xc | -0.716070 | -0.906370 | 0.716060  | 0.221760 |
| Xc | 0.277920  | 0.000000  | 0.000000  | 0.149870 |
| Xc | -0.277920 | 0.000000  | 0.000000  | 0.149870 |
| Xc | 0.000000  | 0.277920  | 0.000000  | 0.149870 |
| Xc | 0.000000  | 0.000000  | 0.277920  | 0.149870 |
| Xc | 0.000000  | -0.277920 | 0.000000  | 0.149870 |
| Xc | 0.000000  | 0.000000  | -0.277920 | 0.149870 |
| Xd | 0.867070  | 0.867070  | 0.867070  | 0.192380 |
| Xd | -0.867070 | -0.867070 | 0.867070  | 0.192380 |
| Xd | -0.867070 | 0.867070  | -0.867070 | 0.192380 |
| Xd | 0.867070  | -0.867070 | -0.867070 | 0.192380 |
| Xd | 0.676910  | -0.676910 | -0.676910 | 0.182580 |
| Xd | -0.676910 | 0.676910  | -0.676910 | 0.182580 |
| Xd | -0.676910 | -0.676910 | 0.676910  | 0.182580 |
| Xd | 0.676910  | 0.676910  | 0.676910  | 0.182580 |
| Xd | -0.164530 | -0.164530 | -0.164530 | 0.141300 |
| Xd | 0.164530  | -0.164530 | 0.164530  | 0.141300 |
| Xd | -0.164530 | 0.164530  | 0.164530  | 0.141300 |
| Xd | 0.164530  | 0.164530  | -0.164530 | 0.141300 |

**PF5 15**

Xyz coordinates, LOL value

(3,-3) CP: Xa

(3,-1) CP: Xb

(3,+1) CP: Xc

(3,+3) CP: Xd

|    |           |           |           |          |
|----|-----------|-----------|-----------|----------|
| Xa | 0.000000  | 0.000000  | 0.000700  | 0.805920 |
| Xa | 0.000010  | -0.000010 | -1.611360 | 0.801150 |
| Xa | 0.000000  | 0.000000  | 1.613150  | 0.798680 |
| Xa | 0.784880  | -1.359450 | 0.002240  | 0.781950 |
| Xa | 0.784880  | 1.359450  | 0.002240  | 0.781950 |
| Xa | -1.576000 | 0.000000  | -0.007970 | 0.772670 |
| Xa | -1.647730 | 0.000000  | -0.350500 | 0.578010 |
| Xa | 0.823870  | 1.426980  | -0.350500 | 0.578010 |
| Xa | 0.823870  | -1.426980 | -0.350500 | 0.578010 |
| Xa | -1.647760 | 0.000000  | 0.351540  | 0.578010 |
| Xa | 0.823880  | -1.427000 | 0.351540  | 0.578010 |
| Xa | 0.823880  | 1.427000  | 0.351540  | 0.578010 |
| Xa | 0.355930  | 0.000000  | -1.673410 | 0.571420 |
| Xa | -0.177960 | -0.308240 | -1.673410 | 0.571420 |
| Xa | -0.177960 | 0.308240  | -1.673410 | 0.571420 |
| Xa | -0.177960 | -0.308240 | 1.674520  | 0.571420 |
| Xa | 0.355930  | 0.000000  | 1.674520  | 0.571420 |
| Xa | -0.177960 | 0.308240  | 1.674520  | 0.571420 |
| Xa | -0.093670 | -0.162240 | 0.000580  | 0.571190 |
| Xa | -0.093670 | 0.162240  | 0.000580  | 0.571190 |
| Xa | 0.187340  | 0.000000  | 0.000580  | 0.571190 |
| Xa | 0.000000  | 0.000000  | -0.186450 | 0.570710 |
| Xa | 0.000000  | 0.000000  | 0.187590  | 0.570710 |
| Xa | 0.000000  | 0.000000  | -0.852200 | 0.569550 |
| Xa | 0.000000  | 0.000000  | 0.853330  | 0.569540 |
| Xa | 0.424360  | 0.735010  | 0.000550  | 0.566170 |
| Xa | 0.424360  | -0.735010 | 0.000550  | 0.566170 |
| Xa | -0.848710 | 0.000000  | 0.000550  | 0.566170 |
| Xa | 0.000000  | 0.000000  | 1.154140  | 0.545680 |
| Xa | 0.000000  | 0.000000  | -1.153050 | 0.545670 |
| Xb | 0.039220  | 0.000000  | -0.182300 | 0.570710 |
| Xb | -0.019610 | 0.033970  | -0.182300 | 0.570710 |
| Xb | -0.019610 | -0.033970 | -0.182300 | 0.570710 |
| Xb | -0.019580 | 0.033910  | 0.183450  | 0.570710 |
| Xb | 0.039160  | 0.000000  | 0.183450  | 0.570710 |
| Xb | -0.019580 | -0.033910 | 0.183450  | 0.570710 |
| Xb | 0.176900  | 0.306410  | -1.680960 | 0.569230 |
| Xb | 0.176900  | -0.306410 | -1.680960 | 0.569230 |
| Xb | -0.353810 | 0.000000  | -1.680960 | 0.569230 |
| Xb | -0.353810 | 0.000000  | 1.682070  | 0.569230 |
| Xb | 0.176900  | 0.306410  | 1.682070  | 0.569230 |
| Xb | 0.176900  | -0.306410 | 1.682070  | 0.569230 |
| Xb | 1.130750  | -1.248110 | 0.000530  | 0.561970 |
| Xb | 0.515520  | 1.603320  | 0.000530  | 0.561970 |
| Xb | 1.130750  | 1.248110  | 0.000530  | 0.561970 |
| Xb | 0.515520  | -1.603320 | 0.000530  | 0.561970 |
| Xb | -1.646270 | -0.355210 | 0.000530  | 0.561970 |
| Xb | -1.646270 | 0.355210  | 0.000530  | 0.561970 |
| Xb | 0.000000  | 0.000000  | 1.084710  | 0.544770 |
| Xb | 0.000000  | 0.000000  | -1.083580 | 0.544760 |
| Xb | 0.428070  | -1.183860 | 0.000190  | 0.540330 |
| Xb | 0.428070  | 1.183860  | 0.000190  | 0.540330 |
| Xb | 0.811220  | -0.962650 | 0.000190  | 0.540330 |
| Xb | 0.811220  | 0.962650  | 0.000190  | 0.540330 |
| Xb | -1.239290 | -0.221210 | 0.000190  | 0.540330 |
| Xb | -1.239290 | 0.221210  | 0.000190  | 0.540330 |
| Xb | -0.097210 | 0.168370  | 1.258110  | 0.539760 |
| Xb | 0.194410  | 0.000000  | 1.258110  | 0.539760 |
| Xb | -0.097210 | -0.168370 | 1.258110  | 0.539760 |
| Xb | 0.194400  | 0.000000  | -1.256990 | 0.539750 |
| Xb | -0.097200 | 0.168350  | -1.256990 | 0.539750 |
| Xb | -0.097200 | -0.168350 | -1.256990 | 0.539750 |
| Xb | -0.588420 | 0.000000  | -0.584550 | 0.365900 |

LOL Topologies

|    |           |           |           |          |
|----|-----------|-----------|-----------|----------|
| Xb | 0.294210  | 0.509590  | -0.584550 | 0.365900 |
| Xb | 0.294210  | -0.509590 | -0.584550 | 0.365900 |
| Xb | 0.294220  | -0.509600 | 0.585670  | 0.365900 |
| Xb | -0.588440 | 0.000000  | 0.585670  | 0.365900 |
| Xb | 0.294220  | 0.509600  | 0.585670  | 0.365900 |
| Xb | 0.855870  | 0.000000  | 0.000550  | 0.318010 |
| Xb | -0.427940 | 0.741210  | 0.000550  | 0.318010 |
| Xb | -0.427940 | -0.741210 | 0.000550  | 0.318010 |
| Xb | 0.000000  | 0.000000  | -0.082450 | 0.272210 |
| Xb | 0.000000  | 0.000000  | 0.083590  | 0.272210 |
| Xb | 0.792860  | 1.373280  | -0.154670 | 0.222460 |
| Xb | 0.792860  | -1.373280 | -0.154670 | 0.222460 |
| Xb | -1.585720 | 0.000000  | -0.154670 | 0.222460 |
| Xb | -1.585740 | 0.000000  | 0.155720  | 0.222460 |
| Xb | 0.792870  | -1.373290 | 0.155720  | 0.222460 |
| Xb | 0.792870  | 1.373290  | 0.155720  | 0.222460 |
| Xb | 0.156110  | 0.000000  | -1.621050 | 0.218900 |
| Xb | -0.078050 | 0.135190  | -1.621050 | 0.218900 |
| Xb | -0.078050 | -0.135190 | -1.621050 | 0.218900 |
| Xb | -0.078050 | 0.135190  | 1.622160  | 0.218900 |
| Xb | 0.156110  | 0.000000  | 1.622160  | 0.218900 |
| Xb | -0.078050 | -0.135190 | 1.622160  | 0.218900 |
| Xb | 0.246090  | 0.426250  | 0.000560  | 0.178240 |
| Xb | 0.246090  | -0.426250 | 0.000560  | 0.178240 |
| Xb | -0.492190 | 0.000000  | 0.000560  | 0.178240 |
| Xb | 0.000000  | 0.000000  | 0.495350  | 0.177150 |
| Xb | 0.000000  | 0.000000  | -0.494220 | 0.177150 |
| Xc | 0.093530  | 0.161990  | 0.000560  | 0.569740 |
| Xc | 0.093530  | -0.161990 | 0.000560  | 0.569740 |
| Xc | -0.187050 | 0.000000  | 0.000560  | 0.569740 |
| Xc | 0.969540  | 1.679300  | 0.000510  | 0.540010 |
| Xc | 0.969540  | -1.679300 | 0.000510  | 0.540010 |
| Xc | -1.939090 | 0.000000  | 0.000510  | 0.540010 |
| Xc | 0.612930  | 1.061630  | -0.196660 | 0.539790 |
| Xc | 0.612930  | -1.061630 | -0.196660 | 0.539790 |
| Xc | -1.225870 | 0.000000  | -0.196660 | 0.539790 |
| Xc | 0.612940  | -1.061650 | 0.197740  | 0.539790 |
| Xc | 0.612940  | 1.061650  | 0.197740  | 0.539790 |
| Xc | -1.225880 | 0.000000  | 0.197740  | 0.539790 |
| Xc | 0.101260  | -0.175400 | 1.266380  | 0.539050 |
| Xc | 0.101260  | 0.175400  | 1.266380  | 0.539050 |
| Xc | -0.202530 | 0.000000  | 1.266380  | 0.539050 |
| Xc | 0.101260  | 0.175380  | -1.265260 | 0.539050 |
| Xc | -0.202520 | 0.000000  | -1.265260 | 0.539050 |
| Xc | 0.101260  | -0.175380 | -1.265260 | 0.539050 |
| Xc | 0.000000  | 0.000000  | 1.976170  | 0.538350 |
| Xc | 0.000000  | 0.000000  | -1.975060 | 0.538350 |
| Xc | -0.378220 | -0.655090 | -0.384810 | 0.302760 |
| Xc | -0.378220 | 0.655090  | -0.384810 | 0.302760 |
| Xc | 0.756440  | 0.000000  | -0.384810 | 0.302760 |
| Xc | -0.378220 | 0.655100  | 0.385940  | 0.302750 |
| Xc | -0.378220 | -0.655100 | 0.385940  | 0.302750 |
| Xc | 0.756440  | 0.000000  | 0.385940  | 0.302750 |
| Xc | -0.041530 | -0.071930 | 0.000570  | 0.271860 |
| Xc | -0.041530 | 0.071930  | 0.000570  | 0.271860 |
| Xc | 0.083050  | 0.000000  | 0.000570  | 0.271860 |
| Xc | 0.078080  | 0.135240  | -1.621240 | 0.218730 |
| Xc | -0.156160 | 0.000000  | -1.621240 | 0.218730 |
| Xc | 0.078080  | -0.135240 | -1.621240 | 0.218730 |
| Xc | -0.156160 | 0.000000  | 1.622340  | 0.218730 |
| Xc | 0.078080  | -0.135240 | 1.622340  | 0.218730 |
| Xc | 0.078080  | 0.135240  | 1.622340  | 0.218730 |
| Xc | 0.930450  | -1.297790 | 0.000530  | 0.214630 |
| Xc | 0.658690  | 1.454690  | 0.000530  | 0.214630 |
| Xc | 0.658690  | -1.454690 | 0.000530  | 0.214630 |
| Xc | 0.930450  | 1.297790  | 0.000530  | 0.214630 |
| Xc | -1.589140 | -0.156900 | 0.000530  | 0.214630 |
| Xc | -1.589140 | 0.156900  | 0.000530  | 0.214630 |
| Xc | 0.180510  | -0.312660 | -0.366770 | 0.159850 |
| Xc | -0.361030 | 0.000000  | -0.366770 | 0.159850 |
| Xc | 0.180510  | 0.312660  | -0.366770 | 0.159850 |

LOL Topologies

|    |           |           |           |          |
|----|-----------|-----------|-----------|----------|
| Xc | 0.180520  | 0.312670  | 0.367890  | 0.159850 |
| Xc | -0.361040 | 0.000000  | 0.367890  | 0.159850 |
| Xc | 0.180520  | -0.312670 | 0.367890  | 0.159850 |
| Xc | -0.266650 | -0.461860 | 0.000550  | 0.147030 |
| Xc | -0.266650 | 0.461860  | 0.000550  | 0.147030 |
| Xc | 0.533310  | 0.000000  | 0.000550  | 0.147030 |
| Xd | 0.041540  | -0.071940 | 0.000570  | 0.271770 |
| Xd | 0.041540  | 0.071940  | 0.000570  | 0.271770 |
| Xd | -0.083070 | 0.000000  | 0.000570  | 0.271770 |
| Xd | 0.867740  | -1.502960 | 0.000520  | 0.198520 |
| Xd | 0.867740  | 1.502960  | 0.000520  | 0.198520 |
| Xd | -1.735470 | 0.000000  | 0.000520  | 0.198520 |
| Xd | 0.000000  | 0.000000  | 1.771720  | 0.198390 |
| Xd | 0.000000  | 0.000000  | -1.770610 | 0.198390 |
| Xd | 0.000000  | 0.000000  | 1.444960  | 0.190530 |
| Xd | 0.000000  | 0.000000  | -1.444960 | 0.190520 |
| Xd | -1.409800 | 0.000000  | 0.000530  | 0.189980 |
| Xd | 0.704900  | 1.220920  | 0.000530  | 0.189980 |
| Xd | 0.704900  | -1.220920 | 0.000530  | 0.189980 |
| Xd | 0.490130  | 0.000000  | -0.212020 | 0.145850 |
| Xd | -0.245060 | 0.424460  | -0.212020 | 0.145850 |
| Xd | -0.245060 | -0.424460 | -0.212020 | 0.145850 |
| Xd | -0.245070 | -0.424470 | 0.213150  | 0.145850 |
| Xd | -0.245070 | 0.424470  | 0.213150  | 0.145850 |
| Xd | 0.490130  | 0.000000  | 0.213150  | 0.145850 |

**SF4 16**

XYZ coordinates, LOL value

(3,-3) CP: Xa

(3,-1) CP: Xb

(3,+1) CP: Xc

(3,+3) CP: Xd

|    |           |           |           |          |
|----|-----------|-----------|-----------|----------|
| Xa | 0.000000  | -1.697280 | 0.306740  | 0.803410 |
| Xa | 0.000000  | 1.698520  | 0.306490  | 0.799340 |
| Xa | 0.000000  | 0.000000  | 0.377660  | 0.799290 |
| Xa | -1.236600 | -0.000960 | -0.644730 | 0.799190 |
| Xa | 1.236600  | 0.000960  | -0.644730 | 0.799190 |
| Xa | 0.000000  | 0.000000  | 1.120070  | 0.679840 |
| Xa | 0.591980  | 0.000000  | -0.148270 | 0.588550 |
| Xa | -0.591980 | 0.000000  | -0.148270 | 0.588550 |
| Xa | -1.278790 | 0.353640  | -0.674480 | 0.580900 |
| Xa | -1.278790 | -0.353640 | -0.674480 | 0.580900 |
| Xa | 1.278790  | 0.353640  | -0.674480 | 0.580900 |
| Xa | 1.278790  | -0.353640 | -0.674480 | 0.580900 |
| Xa | 0.000000  | 0.000000  | 0.549070  | 0.575830 |
| Xa | 0.000000  | -1.765310 | -0.047290 | 0.573240 |
| Xa | 0.000000  | 1.765310  | -0.047290 | 0.573240 |
| Xa | 0.000000  | 1.723850  | 0.667480  | 0.572610 |
| Xa | 0.000000  | -1.723850 | 0.667480  | 0.572610 |
| Xa | 0.000000  | 0.000000  | 0.206060  | 0.570910 |
| Xa | 0.000000  | 0.798440  | 0.301550  | 0.565280 |
| Xa | 0.000000  | -0.798440 | 0.301550  | 0.565280 |
| Xa | 0.860930  | 0.000000  | -0.378940 | 0.531990 |
| Xa | -0.860930 | 0.000000  | -0.378940 | 0.531990 |
| Xb | 0.000000  | -0.076590 | 0.223950  | 0.570870 |
| Xb | 0.000000  | 0.076590  | 0.223950  | 0.570870 |
| Xb | 1.500330  | 0.000000  | -0.399000 | 0.570090 |
| Xb | -1.500330 | 0.000000  | -0.399000 | 0.570090 |
| Xb | 1.048290  | 0.000000  | -0.951780 | 0.568760 |
| Xb | -1.048290 | 0.000000  | -0.951780 | 0.568760 |
| Xb | -0.351060 | 1.749180  | 0.234940  | 0.566380 |
| Xb | -0.351060 | -1.749180 | 0.234940  | 0.566380 |
| Xb | 0.351060  | -1.749180 | 0.234940  | 0.566380 |
| Xb | 0.351060  | 1.749180  | 0.234940  | 0.566380 |
| Xb | -0.827070 | 0.000000  | -0.339370 | 0.531570 |
| Xb | 0.827070  | 0.000000  | -0.339370 | 0.531570 |
| Xb | 0.837430  | 0.000000  | -0.521030 | 0.530310 |
| Xb | -0.837430 | 0.000000  | -0.521030 | 0.530310 |
| Xb | 0.000000  | 1.081300  | 0.286550  | 0.508550 |
| Xb | 0.000000  | -1.081300 | 0.286550  | 0.508550 |
| Xb | 0.000000  | -0.657710 | 0.723310  | 0.498130 |
| Xb | 0.000000  | 0.657710  | 0.723310  | 0.498130 |
| Xb | -0.749610 | 0.000000  | 0.460220  | 0.462590 |
| Xb | 0.749610  | 0.000000  | 0.460220  | 0.462590 |
| Xb | 0.409730  | -0.540380 | 0.031870  | 0.422580 |
| Xb | -0.409730 | -0.540380 | 0.031870  | 0.422580 |
| Xb | 0.409730  | 0.540380  | 0.031870  | 0.422580 |
| Xb | -0.409730 | 0.540380  | 0.031870  | 0.422580 |
| Xb | 0.000000  | 0.000000  | -0.388080 | 0.411410 |
| Xb | 0.000000  | 0.000000  | 0.455180  | 0.278940 |
| Xb | 0.000000  | 0.000000  | 0.301820  | 0.277590 |
| Xb | -1.241560 | 0.155070  | -0.648680 | 0.223270 |
| Xb | 1.241560  | 0.155070  | -0.648680 | 0.223270 |
| Xb | 1.241560  | -0.155070 | -0.648680 | 0.223270 |
| Xb | -1.241560 | -0.155070 | -0.648680 | 0.223270 |
| Xb | 0.000000  | 1.713850  | 0.151590  | 0.219560 |
| Xb | 0.000000  | -1.713850 | 0.151590  | 0.219560 |
| Xb | 0.000000  | 1.695810  | 0.463340  | 0.219410 |
| Xb | 0.000000  | -1.695810 | 0.463340  | 0.219410 |
| Xb | 0.000000  | 0.000000  | 0.801960  | 0.195210 |
| Xb | -0.362690 | 0.000000  | 0.117190  | 0.180350 |
| Xb | 0.362690  | 0.000000  | 0.117190  | 0.180350 |
| Xc | -0.133750 | 0.000000  | 0.269450  | 0.570120 |
| Xc | 0.133750  | 0.000000  | 0.269450  | 0.570120 |
| Xc | 0.000000  | -2.061490 | 0.339570  | 0.534190 |

LOL Topologies

|    |           |           |           |          |
|----|-----------|-----------|-----------|----------|
| Xc | 0.000000  | 2.061490  | 0.339570  | 0.534190 |
| Xc | 0.000000  | -1.305200 | 0.394580  | 0.532620 |
| Xc | 0.000000  | 1.305200  | 0.394580  | 0.532620 |
| Xc | -1.519750 | 0.000000  | -0.874150 | 0.526870 |
| Xc | 1.519750  | 0.000000  | -0.874150 | 0.526870 |
| Xc | 1.044150  | 0.000000  | -0.280150 | 0.526500 |
| Xc | -1.044150 | 0.000000  | -0.280150 | 0.526500 |
| Xc | -0.558200 | -0.500990 | 0.302900  | 0.416340 |
| Xc | 0.558200  | -0.500990 | 0.302900  | 0.416340 |
| Xc | 0.558200  | 0.500990  | 0.302900  | 0.416340 |
| Xc | -0.558200 | 0.500990  | 0.302900  | 0.416340 |
| Xc | 0.000000  | -0.406850 | -0.266690 | 0.388830 |
| Xc | 0.000000  | 0.406850  | -0.266690 | 0.388830 |
| Xc | 0.000000  | -0.075360 | 0.363300  | 0.276320 |
| Xc | 0.000000  | 0.075360  | 0.363300  | 0.276320 |
| Xc | -1.341620 | 0.000000  | -0.528580 | 0.217700 |
| Xc | 1.341620  | 0.000000  | -0.528580 | 0.217700 |
| Xc | -1.143330 | 0.000000  | -0.770580 | 0.217620 |
| Xc | 1.143330  | 0.000000  | -0.770580 | 0.217620 |
| Xc | -0.156780 | -1.706050 | 0.303090  | 0.216440 |
| Xc | 0.156780  | 1.706050  | 0.303090  | 0.216440 |
| Xc | -0.156780 | 1.706050  | 0.303090  | 0.216440 |
| Xc | 0.156780  | -1.706050 | 0.303090  | 0.216440 |
| Xc | 0.447440  | 0.000000  | 0.438430  | 0.173660 |
| Xc | -0.447440 | 0.000000  | 0.438430  | 0.173660 |
| Xc | -0.262330 | -0.346560 | 0.231780  | 0.167530 |
| Xc | 0.262330  | -0.346560 | 0.231780  | 0.167530 |
| Xc | -0.262330 | 0.346560  | 0.231780  | 0.167530 |
| Xc | 0.262330  | 0.346560  | 0.231780  | 0.167530 |
| Xc | 0.000000  | 0.000000  | -0.083750 | 0.166300 |
| Xd | -0.076020 | 0.000000  | 0.366550  | 0.275660 |
| Xd | 0.076020  | 0.000000  | 0.366550  | 0.275660 |
| Xd | 0.000000  | -1.857630 | 0.317300  | 0.197360 |
| Xd | 0.000000  | 1.857630  | 0.317300  | 0.197360 |
| Xd | -1.360830 | 0.000000  | -0.746260 | 0.192310 |
| Xd | 1.360830  | 0.000000  | -0.746260 | 0.192310 |
| Xd | 0.000000  | -1.532590 | 0.298500  | 0.191410 |
| Xd | 0.000000  | 1.532590  | 0.298500  | 0.191410 |
| Xd | 1.106680  | 0.000000  | -0.537660 | 0.183790 |
| Xd | -1.106680 | 0.000000  | -0.537660 | 0.183790 |
| Xd | 0.317010  | -0.327870 | 0.338080  | 0.167330 |
| Xd | -0.317010 | 0.327870  | 0.338080  | 0.167330 |
| Xd | -0.317010 | -0.327870 | 0.338080  | 0.167330 |
| Xd | 0.317010  | 0.327870  | 0.338080  | 0.167330 |
| Xd | 0.000000  | -0.271790 | 0.001600  | 0.163280 |
| Xd | 0.000000  | 0.271790  | 0.001600  | 0.163280 |



**ClF3 14**

XYZ coordinates, LOL value

(3,-3) CP: Xa

(3,-1) CP: Xb

(3,+1) CP: Xc

(3,+3) CP: Xd

|    |           |           |           |          |
|----|-----------|-----------|-----------|----------|
| Cl | 0.000000  | 0.000000  | 0.098858  | 0.000000 |
| F  | 0.000000  | 0.000000  | -1.577642 | 0.000000 |
| F  | 1.756627  | 0.000000  | 0.085300  | 0.000000 |
| F  | -1.756627 | 0.000000  | 0.085300  | 0.000000 |
| Xa | -1.756780 | -0.000900 | 0.085320  | 0.800890 |
| Xa | 1.756780  | 0.000900  | 0.085320  | 0.800890 |
| Xa | 0.000000  | 0.001010  | -1.575890 | 0.797490 |
| Xa | 0.000000  | 0.661360  | 0.238530  | 0.688350 |
| Xa | 0.000000  | -0.661360 | 0.238530  | 0.688350 |
| Xa | 0.000000  | 0.021070  | 0.099270  | 0.625940 |
| Xa | 0.000000  | -0.354510 | -1.610630 | 0.588630 |
| Xa | 0.000000  | 0.354510  | -1.610630 | 0.588630 |
| Xa | -1.791040 | 0.356960  | 0.068080  | 0.581780 |
| Xa | 1.791040  | 0.356960  | 0.068080  | 0.581780 |
| Xa | -1.791040 | -0.356960 | 0.068080  | 0.581780 |
| Xa | 1.791040  | -0.356960 | 0.068080  | 0.581780 |
| Xa | 0.000000  | 0.000000  | -0.693580 | 0.577880 |
| Xa | 0.000000  | -0.156270 | 0.119220  | 0.575380 |
| Xa | 0.000000  | 0.156270  | 0.119220  | 0.575380 |
| Xa | -0.773600 | 0.000000  | 0.057190  | 0.533970 |
| Xa | 0.773600  | 0.000000  | 0.057190  | 0.533970 |
| Xa | 0.000000  | 0.000000  | -1.121370 | 0.494520 |
| Xb | 0.355260  | 0.000000  | -1.610000 | 0.584710 |
| Xb | -0.355260 | 0.000000  | -1.610000 | 0.584710 |
| Xb | 0.000000  | 0.000000  | 0.258400  | 0.572330 |
| Xb | 1.746740  | 0.000000  | 0.448350  | 0.568090 |
| Xb | -1.746740 | 0.000000  | 0.448350  | 0.568090 |
| Xb | -1.830970 | 0.000000  | -0.268050 | 0.567440 |
| Xb | 1.830970  | 0.000000  | -0.268050 | 0.567440 |
| Xb | 0.000000  | 0.000000  | 0.783080  | 0.528470 |
| Xb | 0.000000  | 0.352080  | -0.515720 | 0.526670 |
| Xb | 0.000000  | -0.352080 | -0.515720 | 0.526670 |
| Xb | -0.659650 | -0.259780 | 0.112530  | 0.514770 |
| Xb | -0.659650 | 0.259780  | 0.112530  | 0.514770 |
| Xb | 0.659650  | -0.259780 | 0.112530  | 0.514770 |
| Xb | 0.659650  | 0.259780  | 0.112530  | 0.514770 |
| Xb | -0.052110 | 0.000000  | -1.133870 | 0.494420 |
| Xb | 0.052110  | 0.000000  | -1.133870 | 0.494420 |
| Xb | 0.000000  | 0.000000  | -1.059100 | 0.493650 |
| Xb | -1.117730 | 0.000000  | 0.051100  | 0.478840 |
| Xb | 1.117730  | 0.000000  | 0.051100  | 0.478840 |
| Xb | 0.000000  | -0.070910 | 0.100440  | 0.287870 |
| Xb | 0.000000  | 0.070910  | 0.100440  | 0.287870 |
| Xb | 0.000000  | 0.154360  | -1.582040 | 0.226350 |
| Xb | 0.000000  | -0.154360 | -1.582040 | 0.226350 |
| Xb | 1.761630  | 0.155190  | 0.083190  | 0.223450 |
| Xb | 1.761630  | -0.155190 | 0.083190  | 0.223450 |
| Xb | -1.761630 | 0.155190  | 0.083190  | 0.223450 |
| Xb | -1.761630 | -0.155190 | 0.083190  | 0.223450 |
| Xb | 0.000000  | -0.375210 | 0.178900  | 0.200410 |
| Xb | 0.000000  | 0.375210  | 0.178900  | 0.200410 |
| Xc | 0.000000  | 0.000000  | -0.062060 | 0.568600 |
| Xc | -2.120840 | 0.000000  | 0.138430  | 0.520990 |
| Xc | 2.120840  | 0.000000  | 0.138430  | 0.520990 |
| Xc | 1.354810  | 0.000000  | 0.038000  | 0.513650 |
| Xc | -1.354810 | 0.000000  | 0.038000  | 0.513650 |
| Xc | 0.000000  | 0.000000  | -1.948300 | 0.496790 |
| Xc | 0.000000  | -0.054950 | -1.135440 | 0.494400 |
| Xc | 0.000000  | 0.054950  | -1.135440 | 0.494400 |
| Xc | 0.543780  | 0.000000  | 0.518680  | 0.473320 |
| Xc | -0.543780 | 0.000000  | 0.518680  | 0.473320 |
| Xc | -0.510440 | 0.000000  | -0.392840 | 0.439650 |
| Xc | 0.510440  | 0.000000  | -0.392840 | 0.439650 |

LOL Topologies

|    |           |          |           |          |
|----|-----------|----------|-----------|----------|
| Xc | 0.000000  | 0.000000 | 0.170320  | 0.280770 |
| Xc | 0.154850  | 0.000000 | -1.582260 | 0.224320 |
| Xc | -0.154850 | 0.000000 | -1.582260 | 0.224320 |
| Xc | -1.779460 | 0.000000 | -0.069910 | 0.216680 |
| Xc | 1.779460  | 0.000000 | -0.069910 | 0.216680 |
| Xc | -1.745900 | 0.000000 | 0.242070  | 0.216460 |
| Xc | 1.745900  | 0.000000 | 0.242070  | 0.216460 |
| Xc | 0.000000  | 0.000000 | 0.501480  | 0.182430 |
| Xc | 0.000000  | 0.000000 | -0.315120 | 0.175740 |
| Xd | 0.000000  | 0.000000 | 0.026930  | 0.279900 |
| Xd | -1.917770 | 0.000000 | 0.104080  | 0.191480 |
| Xd | 1.917770  | 0.000000 | 0.104080  | 0.191480 |
| Xd | 1.590860  | 0.000000 | 0.068820  | 0.185300 |
| Xd | -1.590860 | 0.000000 | 0.068820  | 0.185300 |
| Xd | 0.000000  | 0.000000 | -1.742590 | 0.179090 |
| Xd | 0.000000  | 0.000000 | -1.406290 | 0.169640 |
| Xd | -0.317300 | 0.000000 | -0.175070 | 0.169000 |
| Xd | 0.317300  | 0.000000 | -0.175070 | 0.169000 |

**SF2 13**

XYZ coordinates, LOL value

(3,-3) CP: Xa

(3,-1) CP: Xb

(3,+1) CP: Xc

(3,+3) CP: Xd

|    |           |           |           |          |
|----|-----------|-----------|-----------|----------|
| S  | 0.000000  | 0.000000  | -0.104527 | 0.000000 |
| F  | 0.000000  | -1.256057 | -1.155051 | 0.000000 |
| F  | 0.000000  | 1.256057  | -1.155051 | 0.000000 |
| Xa | -0.000010 | 0.000000  | -0.103960 | 0.803220 |
| Xa | -0.000230 | -1.257080 | -1.155900 | 0.798910 |
| Xa | 0.000230  | 1.257080  | -1.155900 | 0.798910 |
| Xa | 0.720380  | 0.000000  | 0.121660  | 0.713460 |
| Xa | -0.352660 | 1.293400  | -1.198960 | 0.584200 |
| Xa | 0.352660  | -1.293400 | -1.198960 | 0.584200 |
| Xa | -0.352660 | -1.293400 | -1.198960 | 0.584200 |
| Xa | 0.352660  | 1.293400  | -1.198960 | 0.584200 |
| Xa | -0.168620 | 0.000000  | -0.083130 | 0.575680 |
| Xa | 0.168620  | 0.000000  | -0.083130 | 0.575680 |
| Xa | 0.000000  | -0.614470 | -0.656460 | 0.563390 |
| Xa | 0.000000  | 0.614470  | -0.656460 | 0.563390 |
| Xa | 0.000000  | -0.893490 | -0.902170 | 0.524900 |
| Xa | 0.000000  | 0.893490  | -0.902170 | 0.524900 |
| Xb | 0.000000  | 0.000000  | 0.067170  | 0.573030 |
| Xb | 0.000000  | 0.000000  | -0.278220 | 0.568570 |
| Xb | 0.000000  | 1.519490  | -0.906800 | 0.567210 |
| Xb | 0.000000  | -1.519490 | -0.906800 | 0.567210 |
| Xb | 0.000000  | -1.074070 | -1.467000 | 0.566010 |
| Xb | 0.000000  | 1.074070  | -1.467000 | 0.566010 |
| Xb | 0.000000  | 0.863700  | -1.002470 | 0.524340 |
| Xb | 0.000000  | -0.863700 | -1.002470 | 0.524340 |
| Xb | 0.000000  | 1.035760  | -0.801600 | 0.522460 |
| Xb | 0.000000  | -1.035760 | -0.801600 | 0.522460 |
| Xb | 0.000000  | -0.823220 | -0.821950 | 0.521540 |
| Xb | 0.000000  | 0.823220  | -0.821950 | 0.521540 |
| Xb | 0.411320  | 0.520980  | -0.492900 | 0.486840 |
| Xb | -0.411320 | 0.520980  | -0.492900 | 0.486840 |
| Xb | -0.411320 | -0.520980 | -0.492900 | 0.486840 |
| Xb | 0.411320  | -0.520980 | -0.492900 | 0.486840 |
| Xb | -0.076180 | 0.000000  | -0.102260 | 0.282620 |
| Xb | 0.076180  | 0.000000  | -0.102260 | 0.282620 |
| Xb | 0.154650  | -1.260960 | -1.160290 | 0.225320 |
| Xb | -0.154650 | -1.260960 | -1.160290 | 0.225320 |
| Xb | 0.154650  | 1.260960  | -1.160290 | 0.225320 |
| Xb | -0.154650 | 1.260960  | -1.160290 | 0.225320 |
| Xb | -0.399920 | 0.000000  | 0.034950  | 0.194510 |
| Xb | 0.399920  | 0.000000  | 0.034950  | 0.194510 |
| Xc | 0.000000  | 0.120220  | -0.229740 | 0.568140 |
| Xc | 0.000000  | -0.120230 | -0.229740 | 0.568140 |
| Xc | 0.000000  | -1.543710 | -1.381670 | 0.525280 |
| Xc | 0.000000  | 1.543710  | -1.381670 | 0.525280 |
| Xc | -0.049470 | 1.029900  | -0.809360 | 0.522460 |
| Xc | 0.049470  | 1.029900  | -0.809360 | 0.522460 |
| Xc | -0.049470 | -1.029900 | -0.809360 | 0.522460 |
| Xc | 0.049470  | -1.029900 | -0.809360 | 0.522460 |
| Xc | 0.000000  | -0.740940 | 0.093670  | 0.374620 |
| Xc | 0.000000  | 0.740940  | 0.093670  | 0.374620 |
| Xc | 0.000000  | 0.000000  | -0.891950 | 0.366290 |
| Xc | 0.000000  | 0.000000  | -0.027850 | 0.276130 |
| Xc | 0.000000  | 0.000000  | -0.181840 | 0.275010 |
| Xc | 0.000000  | -1.361330 | -1.038490 | 0.216360 |
| Xc | 0.000000  | 1.361330  | -1.038490 | 0.216360 |
| Xc | 0.000000  | 1.165030  | -1.283010 | 0.216350 |
| Xc | 0.000000  | -1.165030 | -1.283010 | 0.216350 |
| Xc | 0.000000  | 0.000000  | 0.339080  | 0.176840 |
| Xc | 0.000000  | -0.362700 | -0.383470 | 0.170390 |
| Xc | 0.000000  | 0.362700  | -0.383470 | 0.170390 |
| Xd | 0.000000  | 0.074970  | -0.123040 | 0.274070 |
| Xd | 0.000000  | -0.074970 | -0.123040 | 0.274070 |

LOL Topologies

|    |          |           |           |          |
|----|----------|-----------|-----------|----------|
| Xd | 0.000000 | -1.382270 | -1.255910 | 0.191660 |
| Xd | 0.000000 | 1.382270  | -1.255910 | 0.191660 |
| Xd | 0.000000 | 1.125530  | -1.049580 | 0.182830 |
| Xd | 0.000000 | -1.125530 | -1.049580 | 0.182830 |
| Xd | 0.000000 | -0.448100 | 0.031540  | 0.157230 |
| Xd | 0.000000 | 0.448100  | 0.031540  | 0.157230 |
| Xd | 0.000000 | 0.000000  | -0.578960 | 0.156260 |

**PF3 12**

Xyz coordinates, LOL value

(3,-3) CP: Xa

(3,-1) CP: Xb

(3,+1) CP: Xc

(3,+3) CP: Xd

|    |           |           |           |          |
|----|-----------|-----------|-----------|----------|
| P  | 0.000000  | 0.000000  | -0.194008 | 0.000000 |
| F  | 1.399964  | 0.000000  | 0.605282  | 0.000000 |
| F  | -0.699982 | -1.212405 | 0.605282  | 0.000000 |
| F  | -0.699982 | 1.212405  | 0.605282  | 0.000000 |
| Xa | 0.000000  | 0.000000  | -0.193640 | 0.804880 |
| Xa | 1.398670  | 0.000000  | 0.604580  | 0.799320 |
| Xa | -0.700610 | -1.213490 | 0.602200  | 0.792250 |
| Xa | -0.700610 | 1.213490  | 0.602200  | 0.792250 |
| Xa | 0.000000  | 0.000000  | -0.378710 | 0.575350 |
| Xa | 0.000000  | 0.000000  | -0.006410 | 0.570880 |
| Xa | -0.819330 | 1.419120  | 0.334280  | 0.568430 |
| Xa | -0.819330 | -1.419120 | 0.334280  | 0.568430 |
| Xa | 1.638660  | 0.000000  | 0.334280  | 0.568430 |
| Xa | -0.648740 | -1.123650 | 0.951480  | 0.567810 |
| Xa | -0.648740 | 1.123650  | 0.951480  | 0.567810 |
| Xa | 1.297480  | 0.000000  | 0.951480  | 0.567810 |
| Xa | 1.010580  | 0.000000  | 0.447480  | 0.546740 |
| Xa | -0.505290 | -0.875190 | 0.447480  | 0.546740 |
| Xa | -0.505290 | 0.875190  | 0.447480  | 0.546740 |
| Xb | 0.069610  | 0.120570  | -0.068220 | 0.570180 |
| Xb | -0.139220 | 0.000000  | -0.068220 | 0.570180 |
| Xb | 0.069610  | -0.120570 | -0.068220 | 0.570180 |
| Xb | -1.003190 | 1.062650  | 0.733060  | 0.564650 |
| Xb | -1.003190 | -1.062650 | 0.733060  | 0.564650 |
| Xb | 1.421880  | -0.337460 | 0.733060  | 0.564650 |
| Xb | 1.421880  | 0.337460  | 0.733060  | 0.564650 |
| Xb | -0.418690 | -1.400110 | 0.733060  | 0.564650 |
| Xb | -0.418690 | 1.400110  | 0.733060  | 0.564650 |
| Xb | -0.501080 | 0.867900  | 0.600570  | 0.545410 |
| Xb | 1.002160  | 0.000000  | 0.600570  | 0.545410 |
| Xb | -0.501080 | -0.867900 | 0.600570  | 0.545410 |
| Xb | 0.852980  | 0.000000  | 0.328960  | 0.531380 |
| Xb | -0.426490 | 0.738700  | 0.328960  | 0.531380 |
| Xb | -0.426490 | -0.738700 | 0.328960  | 0.531380 |
| Xb | 0.000000  | 0.000000  | -0.276420 | 0.273570 |
| Xb | 0.000000  | 0.000000  | -0.110770 | 0.272210 |
| Xb | -0.743140 | 1.287160  | 0.474430  | 0.217580 |
| Xb | -0.743140 | -1.287160 | 0.474430  | 0.217580 |
| Xb | 1.486280  | 0.000000  | 0.474430  | 0.217580 |
| Xb | 1.334830  | 0.000000  | 0.747900  | 0.217540 |
| Xb | -0.667410 | -1.156000 | 0.747900  | 0.217540 |
| Xb | -0.667410 | 1.156000  | 0.747900  | 0.217540 |
| Xb | 0.000000  | 0.000000  | -0.667490 | 0.188130 |
| Xb | -0.223220 | -0.386630 | 0.026450  | 0.174120 |
| Xb | -0.223220 | 0.386630  | 0.026450  | 0.174120 |
| Xb | 0.446450  | 0.000000  | 0.026450  | 0.174120 |
| Xc | 0.159030  | 0.000000  | -0.094680 | 0.569630 |
| Xc | -0.079510 | 0.137720  | -0.094680 | 0.569630 |
| Xc | -0.079510 | -0.137720 | -0.094680 | 0.569630 |
| Xc | 1.720090  | 0.000000  | 0.776560  | 0.544810 |
| Xc | -0.860040 | -1.489640 | 0.776560  | 0.544810 |
| Xc | -0.860040 | 1.489640  | 0.776560  | 0.544810 |
| Xc | -0.595530 | -1.031490 | 0.271580  | 0.540870 |
| Xc | -0.595530 | 1.031490  | 0.271580  | 0.540870 |
| Xc | 1.191060  | 0.000000  | 0.271580  | 0.540870 |
| Xc | 0.041030  | -0.071060 | -0.180350 | 0.270320 |
| Xc | 0.041030  | 0.071060  | -0.180350 | 0.270320 |
| Xc | -0.082060 | 0.000000  | -0.180350 | 0.270320 |
| Xc | -0.568220 | 1.296960  | 0.619030  | 0.215960 |
| Xc | -0.839090 | -1.140570 | 0.619030  | 0.215960 |
| Xc | -0.839090 | 1.140570  | 0.619030  | 0.215960 |
| Xc | 1.407310  | 0.156390  | 0.619030  | 0.215960 |
| Xc | 1.407310  | -0.156390 | 0.619030  | 0.215960 |

LOL Topologies

|    |           |           |           |          |
|----|-----------|-----------|-----------|----------|
| Xc | -0.568220 | -1.296960 | 0.619030  | 0.215960 |
| Xc | 0.487410  | 0.000000  | -0.331460 | 0.164990 |
| Xc | -0.243710 | 0.422110  | -0.331460 | 0.164990 |
| Xc | -0.243710 | -0.422110 | -0.331460 | 0.164990 |
| Xc | -0.372480 | 0.000000  | 0.174520  | 0.154500 |
| Xc | 0.186240  | -0.322570 | 0.174520  | 0.154500 |
| Xc | 0.186240  | 0.322570  | 0.174520  | 0.154500 |
| Xd | -0.041070 | 0.071140  | -0.180800 | 0.270260 |
| Xd | -0.041070 | -0.071140 | -0.180800 | 0.270260 |
| Xd | 0.082140  | 0.000000  | -0.180800 | 0.270260 |
| Xd | -0.769760 | -1.333260 | 0.682060  | 0.201290 |
| Xd | -0.769760 | 1.333260  | 0.682060  | 0.201290 |
| Xd | 1.539520  | 0.000000  | 0.682060  | 0.201290 |
| Xd | -0.628270 | -1.088190 | 0.524910  | 0.194410 |
| Xd | -0.628270 | 1.088190  | 0.524910  | 0.194410 |
| Xd | 1.256530  | 0.000000  | 0.524910  | 0.194410 |
| Xd | 0.262920  | -0.455400 | -0.145970 | 0.149690 |
| Xd | 0.262920  | 0.455400  | -0.145970 | 0.149690 |
| Xd | -0.525850 | 0.000000  | -0.145970 | 0.149690 |
| Xd | 0.000000  | 0.000000  | 0.341130  | 0.146430 |

**NH3 18**

XYZ coordinates, LOL value

(3,-3) CP: Xa

(3,-1) CP: Xb

(3,+1) CP: Xc

(3,+3) CP: Xd

|    |           |           |           |          |
|----|-----------|-----------|-----------|----------|
| N  | 0.000000  | 0.000000  | 0.117476  | 0.000000 |
| H  | -0.471152 | 0.816060  | -0.281879 | 0.000000 |
| H  | 0.942305  | 0.000000  | -0.281879 | 0.000000 |
| H  | -0.471152 | -0.816060 | -0.281879 | 0.000000 |
| Xa | -0.379390 | -0.657120 | -0.208970 | 0.899810 |
| Xa | 0.758770  | 0.000000  | -0.208970 | 0.899810 |
| Xa | -0.379390 | 0.657120  | -0.208970 | 0.899810 |
| Xa | 0.000000  | 0.000000  | 0.117940  | 0.798790 |
| Xa | 0.000000  | 0.000000  | 0.594800  | 0.622070 |
| Xb | -0.213120 | -0.369140 | 0.369290  | 0.562360 |
| Xb | -0.213120 | 0.369140  | 0.369290  | 0.562360 |
| Xb | 0.426240  | 0.000000  | 0.369290  | 0.562360 |
| Xb | 0.150910  | 0.261380  | -0.294760 | 0.514390 |
| Xb | -0.301820 | 0.000000  | -0.294760 | 0.514390 |
| Xb | 0.150910  | -0.261380 | -0.294760 | 0.514390 |
| Xb | 0.000000  | 0.000000  | 0.326730  | 0.201390 |
| Xb | 0.000000  | 0.000000  | -0.105560 | 0.186080 |
| Xc | 0.000000  | 0.000000  | -0.378960 | 0.501130 |
| Xc | -0.494460 | 0.000000  | 0.112500  | 0.475990 |
| Xc | 0.247230  | 0.428220  | 0.112500  | 0.475990 |
| Xc | 0.247230  | -0.428220 | 0.112500  | 0.475990 |
| Xc | -0.110920 | 0.192120  | 0.103350  | 0.172040 |
| Xc | 0.221840  | 0.000000  | 0.103350  | 0.172040 |
| Xc | -0.110920 | -0.192120 | 0.103350  | 0.172040 |
| Xd | -0.226130 | 0.000000  | 0.098300  | 0.165040 |
| Xd | 0.113060  | 0.195830  | 0.098300  | 0.165040 |
| Xd | 0.113060  | -0.195830 | 0.098300  | 0.165040 |

**BH3 17**

XYZ coordinates, LOL value

(3,-3) CP: Xa

(3,-1) CP: Xb

(3,+1) CP: Xc

(3,+3) CP: Xd

|    |           |           |           |          |
|----|-----------|-----------|-----------|----------|
| B  | 0.000000  | 0.000000  | 0.000000  | 0.000000 |
| H  | -0.599891 | 1.039042  | 0.000000  | 0.000000 |
| H  | -0.599891 | -1.039042 | 0.000000  | 0.000000 |
| H  | 1.199782  | 0.000000  | 0.000000  | 0.000000 |
| Xa | -0.392030 | -0.679010 | 0.000000  | 0.927560 |
| Xa | 0.784060  | 0.000000  | 0.000000  | 0.927560 |
| Xa | -0.392030 | 0.679010  | 0.000000  | 0.927560 |
| Xa | 0.000400  | -0.000690 | 0.000000  | 0.794360 |
| Xb | -0.703120 | 0.000000  | 0.000000  | 0.490880 |
| Xb | 0.351560  | -0.608920 | 0.000000  | 0.490880 |
| Xb | 0.351560  | 0.608920  | 0.000000  | 0.490880 |
| Xb | 0.317300  | 0.000000  | 0.000000  | 0.174510 |
| Xb | -0.158650 | -0.274790 | 0.000000  | 0.174510 |
| Xb | -0.158650 | 0.274790  | 0.000000  | 0.174510 |
| Xc | -0.337010 | 0.000000  | 0.000000  | 0.153530 |
| Xc | 0.168510  | -0.291860 | 0.000000  | 0.153530 |
| Xc | 0.168510  | 0.291860  | 0.000000  | 0.153530 |
| Xc | 0.000000  | 0.000000  | -0.764600 | 0.144640 |
| Xc | 0.000000  | 0.000000  | 0.764600  | 0.144640 |
| Xd | 0.000000  | 0.000000  | -0.427320 | 0.056640 |
| Xd | 0.000000  | 0.000000  | 0.427320  | 0.056640 |



**H3NBH3 19**

Xyz coordinates, LOL value

(3,-3) CP: Xa

(3,-1) CP: Xb

(3,+1) CP: Xc

(3,+3) CP: Xd

|    |           |           |           |          |
|----|-----------|-----------|-----------|----------|
| B  | 0.000000  | 0.000000  | -0.835476 | 0.000000 |
| N  | 0.000000  | 0.000000  | 0.813283  | 0.000000 |
| H  | -0.476483 | 0.825293  | 1.186179  | 0.000000 |
| H  | -0.476483 | -0.825293 | 1.186179  | 0.000000 |
| H  | 0.952967  | 0.000000  | 1.186179  | 0.000000 |
| H  | 0.587855  | -1.018194 | -1.152852 | 0.000000 |
| H  | 0.587855  | 1.018194  | -1.152852 | 0.000000 |
| H  | -1.175709 | 0.000000  | -1.152852 | 0.000000 |
| Xa | -0.383410 | -0.664090 | 1.118240  | 0.915540 |
| Xa | -0.383410 | 0.664090  | 1.118240  | 0.915540 |
| Xa | 0.766830  | 0.000000  | 1.118240  | 0.915540 |
| Xa | 0.394350  | 0.683030  | -1.037100 | 0.897090 |
| Xa | -0.788690 | 0.000000  | -1.037100 | 0.897090 |
| Xa | 0.394350  | -0.683030 | -1.037100 | 0.897090 |
| Xa | 0.001380  | 0.000000  | 0.814900  | 0.794960 |
| Xa | 0.000130  | 0.000220  | -0.831860 | 0.788770 |
| Xa | 0.000000  | 0.000000  | -0.015230 | 0.666650 |
| Xa | 0.000000  | 0.000000  | 0.233770  | 0.655740 |
| Xb | 0.000000  | 0.000000  | 0.192200  | 0.655590 |
| Xb | 0.417000  | 0.000000  | 0.549530  | 0.545250 |
| Xb | -0.208500 | -0.361130 | 0.549530  | 0.545250 |
| Xb | -0.208500 | 0.361130  | 0.549530  | 0.545250 |
| Xb | -0.372370 | 0.000000  | 1.151570  | 0.518970 |
| Xb | 0.186180  | -0.322480 | 1.151570  | 0.518970 |
| Xb | 0.186180  | 0.322480  | 1.151570  | 0.518970 |
| Xb | -0.332300 | 0.575550  | -1.135890 | 0.475210 |
| Xb | -0.332300 | -0.575550 | -1.135890 | 0.475210 |
| Xb | 0.664590  | 0.000000  | -1.135890 | 0.475210 |
| Xb | -0.529170 | 0.000000  | -0.307930 | 0.417890 |
| Xb | 0.264590  | 0.458280  | -0.307930 | 0.417890 |
| Xb | 0.264590  | -0.458280 | -0.307930 | 0.417890 |
| Xb | 0.000000  | 0.000000  | 0.600480  | 0.193840 |
| Xb | -0.076360 | 0.132260  | 0.973210  | 0.180350 |
| Xb | 0.152720  | 0.000000  | 0.973210  | 0.180350 |
| Xb | -0.076360 | -0.132260 | 0.973210  | 0.180350 |
| Xb | 0.160020  | -0.277160 | -0.893350 | 0.163160 |
| Xb | 0.160020  | 0.277160  | -0.893350 | 0.163160 |
| Xb | -0.320030 | 0.000000  | -0.893350 | 0.163160 |
| Xc | 0.000000  | 0.000000  | 1.297850  | 0.481740 |
| Xc | 0.238560  | 0.413200  | 0.732620  | 0.473330 |
| Xc | 0.238560  | -0.413200 | 0.732620  | 0.473330 |
| Xc | -0.477120 | 0.000000  | 0.732620  | 0.473330 |
| Xc | -0.303140 | -0.525050 | -0.435190 | 0.340550 |
| Xc | 0.606280  | 0.000000  | -0.435190 | 0.340550 |
| Xc | -0.303140 | 0.525050  | -0.435190 | 0.340550 |
| Xc | 0.000000  | 0.000000  | -1.562560 | 0.295950 |
| Xc | -0.005760 | 0.000000  | 1.036800  | 0.179810 |
| Xc | 0.217900  | 0.000000  | 0.779750  | 0.177320 |
| Xc | -0.108950 | -0.188710 | 0.779750  | 0.177320 |
| Xc | -0.108950 | 0.188710  | 0.779750  | 0.177320 |
| Xc | 0.330390  | 0.000000  | -0.929170 | 0.144440 |
| Xc | -0.165190 | -0.286120 | -0.929170 | 0.144440 |
| Xc | -0.165190 | 0.286120  | -0.929170 | 0.144440 |
| Xc | 0.028820  | 0.049930  | -0.479500 | 0.118490 |
| Xc | 0.028820  | -0.049930 | -0.479500 | 0.118490 |
| Xc | -0.057650 | 0.000000  | -0.479500 | 0.118490 |
| Xd | 0.112420  | 0.194730  | 0.806740  | 0.170360 |
| Xd | 0.112420  | -0.194730 | 0.806740  | 0.170360 |
| Xd | -0.224850 | 0.000000  | 0.806740  | 0.170360 |
| Xd | -0.076330 | -0.132210 | -0.505300 | 0.118060 |
| Xd | -0.076330 | 0.132210  | -0.505300 | 0.118060 |
| Xd | 0.152670  | 0.000000  | -0.505300 | 0.118060 |
| Xd | 0.000000  | 0.000000  | -1.207280 | 0.107990 |

### Kinetic Core Radii

Plots of  $v(\mathbf{r})$  for basic atoms H, C, Si, Ge are shown below. Basic atoms constitute fundamental fragments of a molecule; they are chosen to be spherically symmetric and spin-restricted (i.e. spin- $\alpha$  and spin- $\beta$  orbitals are spatially identical; they are equally occupied, and fractional occupations are applied, if necessary, to distribute the electrons equally over symmetry-degenerate states).<sup>S1</sup> The underlying wavefunctions were relativistically optimized (scalar; ZORA),<sup>S2</sup> and use a basis set of valence quadruple zeta quality augmented by four polarization functions (QZ4P).<sup>S3</sup> The abscissae (in a.u.) of plots of  $v(\mathbf{r})$  are logarithmic.

The development of a kinetic core radius  $r_{\text{KC}}$  is not rooted in physical concepts, but is driven by the search for a geometric criterion that allows one to partition an entire set of CP3s into topologically consistent and chemically meaningful subsets. In this work, positions of extrema  $r_{\text{min}}$  and  $r_{\text{max}}$  in  $v$  as well as positions  $r_{1/2}$ , where  $v$  for the first time drops below 0.666, serve as basis for kinetic core radii  $r_{\text{KC}}$ .  $v = 0.666$  roughly corresponds to a  $\tau/\tau_0$  ratio of one half.

According to this pragmatic approach, kinetic core radii were chosen as follows:

For H:

$$- r_{\text{KC}} = r_{1/2}$$

For C:

$$- r_{\text{KC}} = (r_{\text{min}}(\text{last minimum}) + r_{1/2})/2$$

For Si and Ge:

$$- r_{\text{KC}} = (r_{\text{min}}(\text{last minimum}) + r_{\text{min}}(\text{second last minimum}))/2$$

S1: Chemical Physics Letters 265,481 (1997).

S2: Journal of Chemical Physics 105, 6505 (1994).

S3: Journal of Computational Chemistry 24, 1142 (2003).

**H**

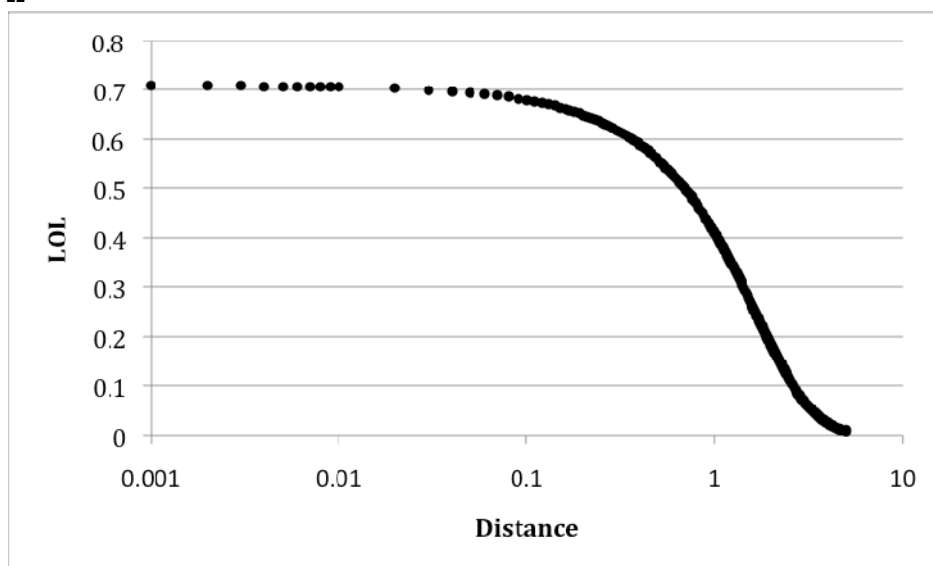

**C**

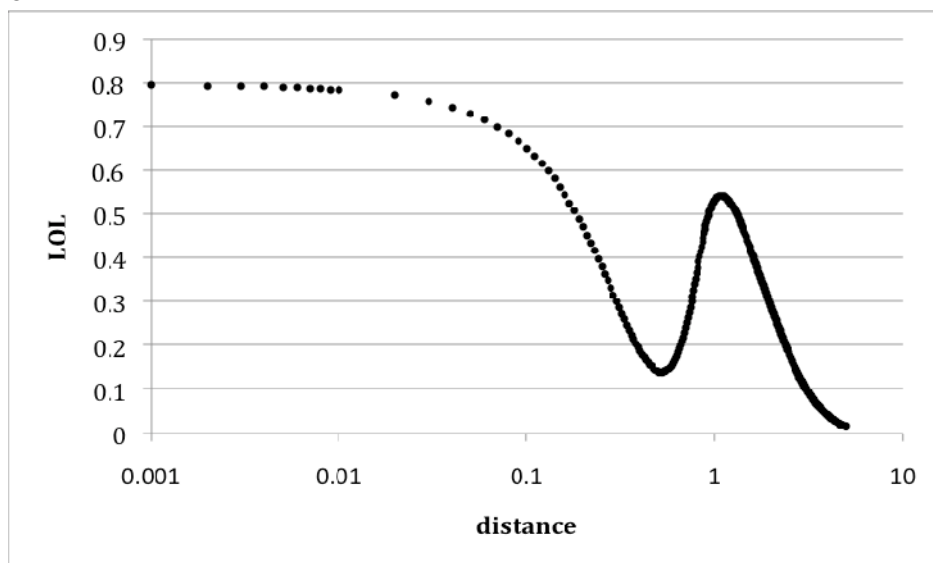

Si

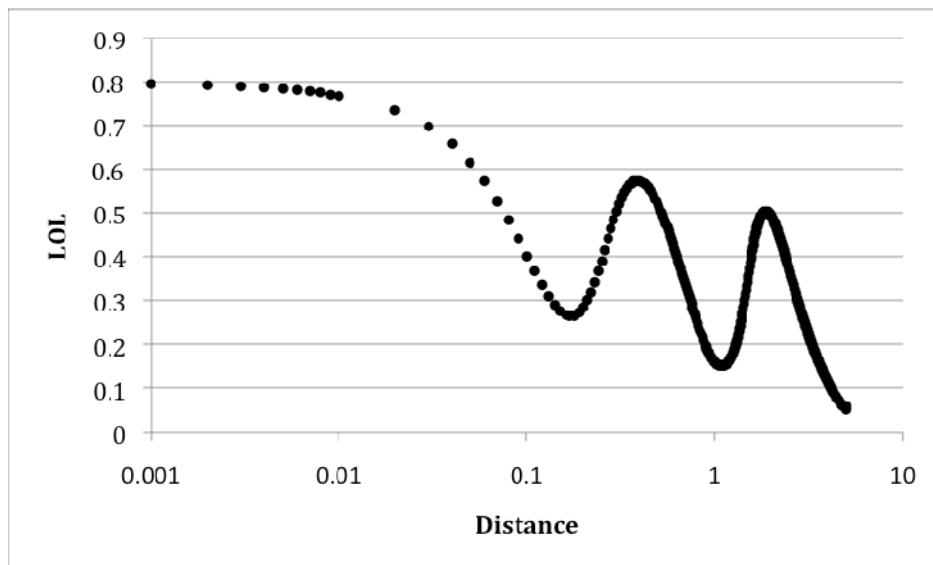

Ge

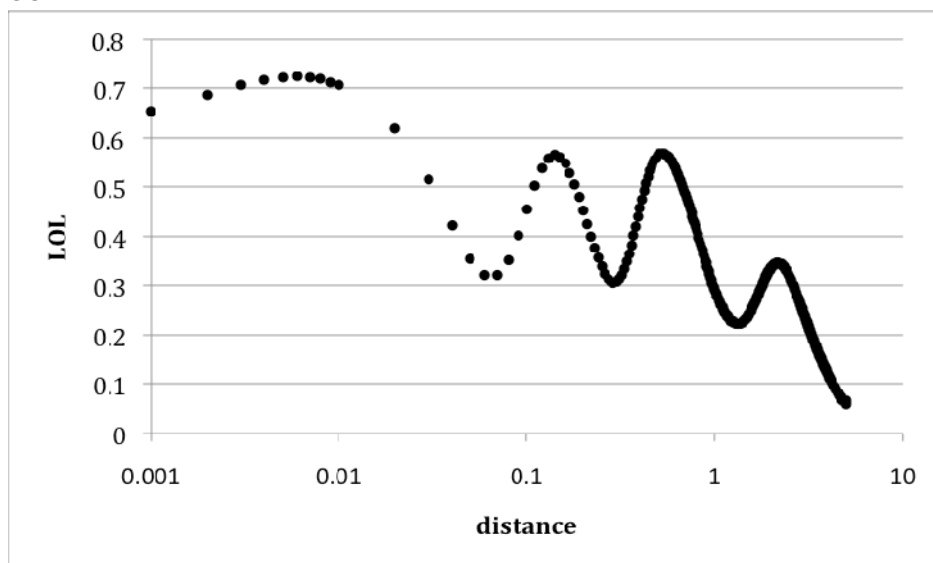

### STOs vs. GTOs

The current work utilizes Slater-type functions STOs as basis for molecular orbitals, while the majority of quantum chemical programs exploit Gaussian-type functions GTOs. The difference is explored in  $v(\mathbf{r})$  calculations of  $C_2H_6$ . To achieve consistency, the geometry of ethane has been optimized under  $C_{3v}$ -symmetry constraint using PBE/TZVP(STO) and PBE/TZVP(GTO) calculations. The optimized geometries are virtually identical; a comparison is given in the table below.

QuickTime™ and a decompressor are needed to see this picture.

Both calculations produce consistent  $v(\mathbf{r})$  topologies with  $PoHo\# = 1$ . The details are given in the table below:

|                | (3, -3) | (3, -1) | (3, 1) | (3, 3) |
|----------------|---------|---------|--------|--------|
| PBE/TZVP (STO) | 9       | 20      | 20     | 8      |
| PBE/TZVP (GTO) | 15      | 26      | 20     | 8      |

Since an STO has a cusp at its origin, while a GTO smoothly proceeds to zero slope, and since the basis functions are centered at atomic positions, the innermost core region is inadequately described by GTOs. The GTO calculations result in six additional (3,-3) CPs, and six additional (3,-1) CPs. These additional CPs are located in close vicinity to the hydrogen atoms, as show in the pictures below:

QuickTime™ and a decompressor are needed to see this picture.

QuickTime™ and a decompressor are needed to see this picture.

PBE/TZVP (STO)

PBE/TZVP (GTO)

A detailed comparison of (3,-3) and (3,-1) CPs is given in the table below:

QuickTime™ and a  
decompressor  
are needed to see this picture.

Notable differences are found for two of the (3,-3) CPs, which are located at approximately the same position close to the carbon atoms, but which show differences in  $v(\mathbf{r})$ . The fact that a GTO approaches zero slope at the position of a nucleus is reflected in the  $v(\mathbf{r})$  values (0.99896) approaching 1.0. Slight differences in the corresponding STO  $v(\mathbf{r})$  values are due to the fact that the (3,-3) CPs are estimated as approximate endpoints of MaxKCLs.

STO and GTO Basis Sets

A detailed comparison of (3,1) and (3,3) CPs is given in the table below:

QuickTime™ and a decompressor are needed to see this picture.

The results of PBE/TZVP(STO) and PBE/TZVP(GTO) calculations are virtually identical.
