# Supplementary material for: Topology maps of bond descriptors based on the kinetic energy density and the essence of chemical bonding
Source: Royal Society of Chemistry journal article supplement (doi:10.1039/c3cp44162h), 2013-01-01
Supplement: c3cp44162h_2.pdf [file c3cp44162h_2.pdf]

**STOs vs. GTOs**

The current work utilizes Slater-type functions STOs as basis for molecular orbitals, while the majority of quantum chemical programs exploit Gaussian-type functions GTOs. The difference is explored in  $v(\mathbf{r})$  calculations of  $C_2H_6$ . To achieve consistency, the geometry of ethane has been optimized under  $C_{3v}$ -symmetry constraint using PBE/TZVP(STO) and PBE/TZVP(GTO) calculations. The optimized geometries are virtually identical; a comparison is given in the table below.

|   | GTO       |           |           | STO       |           |           |            |
|---|-----------|-----------|-----------|-----------|-----------|-----------|------------|
|   | x         | y         | z         | x         | y         | z         | $\Delta R$ |
| C | 0.000000  | 0.000000  | -0.764695 | 0.000000  | 0.000000  | -0.764738 | 4.300E-05  |
| C | 0.000000  | 0.000000  | 0.764932  | 0.000000  | 0.000000  | 0.764896  | 3.600E-05  |
| H | 0.000000  | 1.024264  | 1.166814  | 0.000000  | 1.024226  | 1.166463  | 3.531E-04  |
| H | -0.887039 | -0.512132 | 1.166814  | -0.887006 | -0.512113 | 1.166463  | 3.531E-04  |
| H | 0.887039  | -0.512132 | 1.166814  | 0.887006  | -0.512113 | 1.166463  | 3.531E-04  |
| H | 0.000000  | -1.024143 | -1.167287 | 0.000000  | -1.024163 | -1.166620 | 6.673E-04  |
| H | 0.886934  | 0.512071  | -1.167287 | 0.886952  | 0.512082  | -1.166620 | 6.673E-04  |
| H | -0.886934 | 0.512071  | -1.167287 | -0.886952 | 0.512082  | -1.166620 | 6.673E-04  |

Both calculations produce consistent  $v(\mathbf{r})$  topologies with  $PoHo\# = 1$ . The details are given in the table below:

|               | (3,-3) | (3,-1) | (3,1) | (3,3) |
|---------------|--------|--------|-------|-------|
| PBE/TZVP(STO) | 9      | 20     | 20    | 8     |
| PBE/TZVP(GTO) | 15     | 26     | 20    | 8     |

Since an STO has a cusp at its origin, while a GTO smoothly proceeds to zero slope, and since the basis functions are centered at atomic positions, the innermost core region is inadequately described by GTOs. The GTO calculations result in six additional (3,-3) CPs, and six additional (3,-1) CPs. These additional CPs are located in close vicinity to the hydrogen atoms, as show in the pictures below:

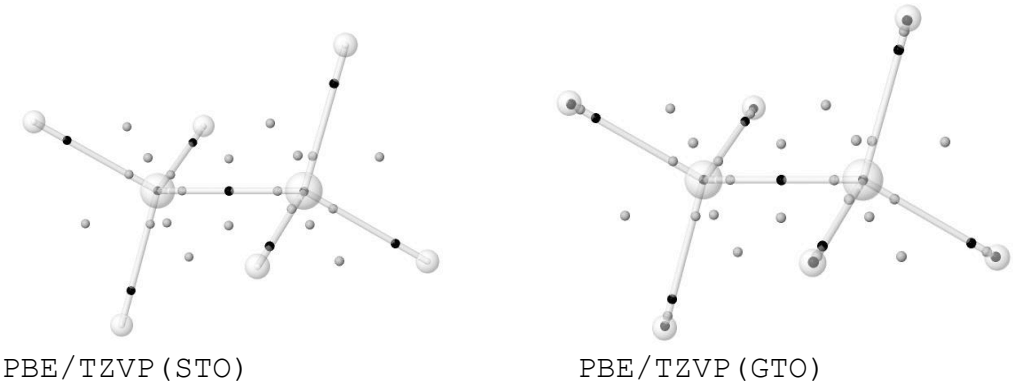

A detailed comparison of (3,-3) and (3,-1) CPs is given in the table below:

|    | GTO      |          |          |         | STO      |          |          |         | $\Delta R$ | $\Delta v$ (GTO-STO) |
|----|----------|----------|----------|---------|----------|----------|----------|---------|------------|----------------------|
|    | x        | y        | z        | v       | x        | y        | z        | v       |            |                      |
| Xa | 0.00000  | 0.00000  | -0.76469 | 0.99896 | 0.00017  | 0.00010  | -0.76415 | 0.79673 | 5.75E-04   | 2.02E-01             |
| Xa | 0.00000  | 0.00000  | 0.76493  | 0.99896 | -0.00031 | 0.00018  | 0.76471  | 0.79722 | 4.21E-04   | 2.02E-01             |
| Xa | 0.00000  | 1.01188  | 1.16185  | 0.98990 |          |          |          |         |            |                      |
| Xa | 0.00000  | -1.01176 | -1.16232 | 0.98990 |          |          |          |         |            |                      |
| Xa | -0.87631 | -0.50594 | 1.16185  | 0.98990 |          |          |          |         |            |                      |
| Xa | 0.87631  | -0.50594 | 1.16185  | 0.98990 |          |          |          |         |            |                      |
| Xa | 0.87621  | 0.50588  | -1.16232 | 0.98990 |          |          |          |         |            |                      |
| Xa | -0.87621 | 0.50588  | -1.16232 | 0.98990 |          |          |          |         |            |                      |
| Xa | 0.71516  | -0.41290 | 1.08672  | 0.91719 | 0.65603  | -0.37876 | 1.05854  | 0.91279 | 7.39E-02   | 4.40E-03             |
| Xa | -0.71516 | -0.41290 | 1.08672  | 0.91719 | -0.65603 | -0.37876 | 1.05854  | 0.91279 | 7.39E-02   | 4.40E-03             |
| Xa | 0.00000  | 0.82579  | 1.08672  | 0.91719 | 0.00000  | 0.75752  | 1.05854  | 0.91279 | 7.39E-02   | 4.40E-03             |
| Xa | 0.71507  | 0.41285  | -1.08701 | 0.91716 | 0.65600  | 0.37874  | -1.05859 | 0.91278 | 7.39E-02   | 4.38E-03             |
| Xa | -0.71507 | 0.41285  | -1.08701 | 0.91716 | -0.65600 | 0.37874  | -1.05859 | 0.91278 | 7.39E-02   | 4.38E-03             |
| Xa | 0.00000  | -0.82569 | -1.08700 | 0.91716 | 0.00000  | -0.75748 | -1.05859 | 0.91278 | 7.39E-02   | 4.38E-03             |
| Xa | 0.00000  | 0.00000  | 0.00008  | 0.82161 | 0.00000  | 0.00000  | 0.00006  | 0.81919 | 2.00E-05   | 2.42E-03             |
| Xb | -0.81622 | -0.47124 | 1.13400  | 0.86300 |          |          |          |         |            |                      |
| Xb | 0.81622  | -0.47124 | 1.13400  | 0.86300 |          |          |          |         |            |                      |
| Xb | 0.00000  | 0.94249  | 1.13400  | 0.86300 |          |          |          |         |            |                      |
| Xb | 0.81613  | 0.47120  | -1.13440 | 0.86295 |          |          |          |         |            |                      |
| Xb | -0.81613 | 0.47120  | -1.13440 | 0.86295 |          |          |          |         |            |                      |
| Xb | 0.00000  | -0.94239 | -1.13440 | 0.86295 |          |          |          |         |            |                      |
| Xb | 0.00000  | 0.49102  | -1.10795 | 0.50726 | 0.00000  | 0.49129  | -1.10753 | 0.50747 | 4.99E-04   | -2.10E-04            |
| Xb | 0.42524  | -0.24551 | -1.10793 | 0.50726 | 0.42547  | -0.24565 | -1.10753 | 0.50747 | 4.82E-04   | -2.10E-04            |
| Xb | -0.42524 | -0.24551 | -1.10793 | 0.50726 | -0.42547 | -0.24565 | -1.10753 | 0.50747 | 4.82E-04   | -2.10E-04            |
| Xb | 0.00000  | -0.49104 | 1.10806  | 0.50722 | 0.00000  | -0.49131 | 1.10763  | 0.50745 | 5.08E-04   | -2.30E-04            |
| Xb | -0.42526 | 0.24553  | 1.10804  | 0.50722 | -0.42549 | 0.24566  | 1.10763  | 0.50745 | 4.88E-04   | -2.30E-04            |
| Xb | 0.42526  | 0.24553  | 1.10804  | 0.50722 | 0.42549  | 0.24566  | 1.10763  | 0.50745 | 4.88E-04   | -2.30E-04            |
| Xb | -0.42332 | -0.24440 | 0.42271  | 0.49960 | -0.42376 | -0.24466 | 0.42346  | 0.50077 | 9.08E-04   | -1.17E-03            |
| Xb | 0.42332  | -0.24440 | 0.42271  | 0.49960 | 0.42376  | -0.24466 | 0.42346  | 0.50077 | 9.08E-04   | -1.17E-03            |
| Xb | 0.00000  | 0.48880  | 0.42271  | 0.49959 | 0.00000  | 0.48932  | 0.42346  | 0.50077 | 9.13E-04   | -1.18E-03            |
| Xb | 0.42339  | 0.24444  | -0.42265 | 0.49957 | 0.42379  | 0.24468  | -0.42338 | 0.50075 | 8.66E-04   | -1.18E-03            |
| Xb | -0.42339 | 0.24444  | -0.42265 | 0.49957 | -0.42379 | 0.24468  | -0.42338 | 0.50075 | 8.66E-04   | -1.18E-03            |
| Xb | 0.00000  | -0.48888 | -0.42265 | 0.49956 | 0.00000  | -0.48935 | -0.42338 | 0.50075 | 8.68E-04   | -1.19E-03            |
| Xb | -0.21704 | -0.12531 | 0.84543  | 0.16528 | -0.21657 | -0.12504 | 0.84766  | 0.17040 | 2.29E-03   | -5.12E-03            |
| Xb | 0.21704  | -0.12531 | 0.84543  | 0.16528 | 0.21657  | -0.12504 | 0.84766  | 0.17040 | 2.29E-03   | -5.12E-03            |
| Xb | 0.00000  | 0.25062  | 0.84542  | 0.16528 | 0.00000  | 0.25007  | 0.84766  | 0.17040 | 2.31E-03   | -5.12E-03            |
| Xb | 0.21703  | 0.12530  | -0.84526 | 0.16527 | 0.21656  | 0.12503  | -0.84753 | 0.17039 | 2.33E-03   | -5.12E-03            |
| Xb | -0.21703 | 0.12530  | -0.84526 | 0.16527 | -0.21656 | 0.12503  | -0.84753 | 0.17039 | 2.33E-03   | -5.12E-03            |
| Xb | 0.00000  | -0.25060 | -0.84525 | 0.16527 | 0.00000  | -0.25006 | -0.84753 | 0.17039 | 2.34E-03   | -5.12E-03            |
| Xb | 0.00000  | 0.00000  | -0.49865 | 0.16082 | 0.00000  | 0.00000  | -0.49839 | 0.16542 | 2.60E-04   | -4.60E-03            |
| Xb | 0.00000  | 0.00000  | 0.49888  | 0.16081 | 0.00000  | 0.00000  | 0.49855  | 0.16542 | 3.30E-04   | -4.61E-03            |

Notable differences are found for two of the (3,-3) CPs, which are located at approximately the same position close to the carbon atoms, but which show differences in  $v(\mathbf{r})$ . The fact that a GTO approaches zero slope at the position of a nucleus is reflected in the  $v(\mathbf{r})$  values (0.99896) approaching 1.0. Slight differences in the corresponding STO  $v(\mathbf{r})$  values are due to the fact that the (3,-3) CPs are estimated as approximate endpoints of MaxKCLs.

A detailed comparison of (3,1) and (3,3) CPs is given in the table below:

|    | GTO      |          |          |         | STO      |          |          |         | $\Delta R$ | $\Delta v$ (GTO-STO) |
|----|----------|----------|----------|---------|----------|----------|----------|---------|------------|----------------------|
|    | x        | y        | z        | v       | x        | y        | z        | v       |            |                      |
| Xc | 0.46693  | -0.26960 | -0.56894 | 0.41881 | 0.47107  | -0.27197 | -0.57043 | 0.41832 | 5.00E-03   | 4.90E-04             |
| Xc | -0.46693 | -0.26960 | -0.56894 | 0.41881 | -0.47107 | -0.27197 | -0.57043 | 0.41832 | 5.00E-03   | 4.90E-04             |
| Xc | 0.00000  | 0.53918  | -0.56895 | 0.41881 | 0.00000  | 0.54394  | -0.57043 | 0.41832 | 4.98E-03   | 4.90E-04             |
| Xc | -0.46690 | 0.26958  | 0.56908  | 0.41879 | -0.47105 | 0.27196  | 0.57054  | 0.41831 | 5.00E-03   | 4.80E-04             |
| Xc | 0.46690  | 0.26958  | 0.56908  | 0.41879 | 0.47105  | 0.27196  | 0.57054  | 0.41831 | 5.00E-03   | 4.80E-04             |
| Xc | 0.00000  | -0.53913 | 0.56909  | 0.41878 | 0.00000  | -0.54392 | 0.57054  | 0.41831 | 5.00E-03   | 4.70E-04             |
| Xc | 0.00000  | -0.00001 | -1.33996 | 0.41204 | 0.00000  | 0.00000  | -1.34324 | 0.41043 | 3.28E-03   | 1.61E-03             |
| Xc | 0.00000  | 0.00001  | 1.34018  | 0.41203 | 0.00000  | 0.00000  | 1.34338  | 0.41043 | 3.20E-03   | 1.60E-03             |
| Xc | 0.00000  | -0.23434 | 0.89894  | 0.15745 | 0.00000  | -0.23182 | 0.90555  | 0.16033 | 7.07E-03   | -2.88E-03            |
| Xc | -0.20295 | 0.11717  | 0.89893  | 0.15745 | -0.20076 | 0.11591  | 0.90555  | 0.16033 | 7.09E-03   | -2.88E-03            |
| Xc | 0.20295  | 0.11717  | 0.89893  | 0.15745 | 0.20076  | 0.11591  | 0.90555  | 0.16033 | 7.09E-03   | -2.88E-03            |
| Xc | 0.00000  | 0.23431  | -0.89876 | 0.15744 | 0.00000  | 0.23181  | -0.90541 | 0.16032 | 7.10E-03   | -2.88E-03            |
| Xc | 0.20292  | -0.11716 | -0.89875 | 0.15744 | 0.20075  | -0.11590 | -0.90541 | 0.16032 | 7.12E-03   | -2.88E-03            |
| Xc | -0.20292 | -0.11716 | -0.89875 | 0.15744 | -0.20075 | -0.11590 | -0.90541 | 0.16032 | 7.12E-03   | -2.88E-03            |
| Xc | 0.00000  | 0.20259  | 0.58510  | 0.15626 | 0.00000  | 0.20730  | 0.58835  | 0.15885 | 5.72E-03   | -2.59E-03            |
| Xc | -0.17545 | -0.10129 | 0.58511  | 0.15626 | -0.17953 | -0.10365 | 0.58835  | 0.15885 | 5.72E-03   | -2.59E-03            |
| Xc | 0.17545  | -0.10129 | 0.58511  | 0.15626 | 0.17953  | -0.10365 | 0.58835  | 0.15885 | 5.72E-03   | -2.59E-03            |
| Xc | 0.00000  | -0.20271 | -0.58501 | 0.15626 | 0.00000  | -0.20735 | -0.58825 | 0.15885 | 5.66E-03   | -2.59E-03            |
| Xc | 0.17556  | 0.10135  | -0.58502 | 0.15626 | 0.17957  | 0.10367  | -0.58825 | 0.15885 | 5.65E-03   | -2.59E-03            |
| Xc | -0.17556 | 0.10135  | -0.58502 | 0.15626 | -0.17957 | 0.10367  | -0.58825 | 0.15885 | 5.65E-03   | -2.59E-03            |
|    |          |          |          |         |          |          |          |         |            |                      |
| Xd | -0.21618 | 0.12481  | 0.64936  | 0.15191 | -0.22024 | 0.12716  | 0.65344  | 0.15232 | 6.22E-03   | -4.10E-04            |
| Xd | 0.21618  | 0.12481  | 0.64936  | 0.15191 | 0.22024  | 0.12716  | 0.65344  | 0.15232 | 6.22E-03   | -4.10E-04            |
| Xd | 0.00000  | -0.24962 | 0.64937  | 0.15190 | 0.00000  | -0.25431 | 0.65344  | 0.15232 | 6.21E-03   | -4.20E-04            |
| Xd | 0.21623  | -0.12484 | -0.64925 | 0.15190 | 0.22026  | -0.12717 | -0.65332 | 0.15232 | 6.18E-03   | -4.20E-04            |
| Xd | -0.21623 | -0.12484 | -0.64925 | 0.15190 | -0.22026 | -0.12717 | -0.65332 | 0.15232 | 6.18E-03   | -4.20E-04            |
| Xd | 0.00000  | 0.24968  | -0.64925 | 0.15190 | 0.00000  | 0.25433  | -0.65332 | 0.15232 | 6.18E-03   | -4.20E-04            |
| Xd | 0.00000  | 0.00001  | 1.04091  | 0.14943 | 0.00000  | 0.00000  | 1.04324  | 0.14989 | 2.33E-03   | -4.60E-04            |
| Xd | 0.00000  | -0.00001 | -1.04068 | 0.14943 | 0.00000  | 0.00000  | -1.04308 | 0.14989 | 2.40E-03   | -4.60E-04            |

The results of PBE/TZVP(STO) and PBE/TZVP(GTO) calculations are virtually identical.
